# Supplementary material for: Palladium-catalyzed rearrangement reaction to access 1-phenanthrol derivatives
Source: Royal Society of Chemistry journal article supplement (doi:10.1039/d2cc00392a), 2022-01-01
Supplement: d2cc00392a1.pdf [file d2cc00392a1.pdf]

## Supporting Information

# Palladium-Catalyzed Rearrangement Reaction to Access 1-Phenanthrol Derivatives

Ce Liu,<sup>1,2</sup> Wei-Yu Shi,<sup>1</sup> Ya-Nan Ding,<sup>1</sup> Nian Zheng,<sup>1</sup> and Yong-Min Liang<sup>1\*</sup>

<sup>1</sup>State Key Laboratory of Applied Organic Chemistry, Lanzhou University, Lanzhou 730000, China

<sup>2</sup> State Key Laboratory for Oxo Synthesis and Selective Oxidation, Lanzhou Institute of Chemical Physics (LICP),  
Chinese Academy of Sciences, Lanzhou 730000, China

\*Correspondence: liangym@lzu.edu.cn

## Contents

|          |                                                |            |
|----------|------------------------------------------------|------------|
| <b>1</b> | <b>General Information</b> .....               | <b>S2</b>  |
| <b>2</b> | <b>Structures</b> .....                        | <b>S3</b>  |
| <b>3</b> | <b>Experimental Section</b> .....              | <b>S4</b>  |
| <b>4</b> | <b>NMR Spectra</b> .....                       | <b>S16</b> |
| <b>5</b> | <b>X-ray Crystallographic Data of 2q</b> ..... | <b>S35</b> |
| <b>6</b> | <b>Reference</b> .....                         | <b>S37</b> |

## 1 General Information

**General Procedures.** Unless otherwise noted, reactions were performed under a nitrogen atmosphere. Plastic syringes were used to transfer air- and moisture-sensitive reagents. Solvent was freshly distilled/degassed prior to use unless otherwise noted. Analytical TLC was performed with silica gel GF254 plates. For column chromatography, a 200-300 mesh silica gel was employed. Organic solutions were concentrated under reduced pressure using a rotary evaporator. Room temperature is 23-25 °C.

**Materials.** Commercial reagents were purchased from Acros, Accela, Adamas, Alfa, Ark, Aladdin, or TCI, and used as received with the following exceptions. Ethylene glycol dimethyl ether (DME) and toluene were dried over Na with benzophenone-ketyl intermediate as indicator. Acetonitrile (CH<sub>3</sub>CN) was distilled over P<sub>2</sub>O<sub>5</sub>. *N,N*-Dimethylformamide (DMF) and *N,N*-Dimethylacetamide (DMA) was distilled under reduced pressure. Other commercially available reagents and solvents were used without further purification.

**Instrumentation.** Deuterated solvents were purchased from Cambridge Isotope Laboratories. <sup>1</sup>H NMR spectra were recorded on Bruker AVANCE III 400, Agilent Mercury plus 300 BB and INOVA instruments with 400, 300, and 600 MHz frequencies, and <sup>13</sup>C NMR spectra were recorded on a Bruker AVANCE III 400 instrument with a <sup>13</sup>C operating frequency of 100 MHz. <sup>19</sup>F NMR spectra were recorded on a Bruker AVANCE III 400 spectrometer with a <sup>19</sup>F operating frequency of 376 MHz. Chemical shifts ( $\delta$ ) were reported in ppm relative to the residual solvent signal (CDCl<sub>3</sub>  $\delta$  = 7.26 for <sup>1</sup>H NMR and  $\delta$  = 77.0 for <sup>13</sup>C NMR; DMSO-*d*<sub>6</sub>  $\delta$  = 2.50 for <sup>1</sup>H NMR and  $\delta$  = 40.0 for <sup>13</sup>C NMR; CD<sub>3</sub>OD  $\delta$  = 3.31 for <sup>1</sup>H NMR and  $\delta$  = 49.0 for <sup>13</sup>C NMR). Chemical shifts (ppm) were recorded with tetramethylsilane (TMS) as the internal reference standard. Multiplicities are given as s (singlet), d (doublet), t (triplet), dd (doublet of doublets), or m (multiplet). HRMS was obtained using a Q-TOF instrument equipped with an ESI source. Data collection for crystal structure was performed at room temperature using Mo K $\alpha$  radiation on a Bruker APEXII diffractometer.

## 2 Structures

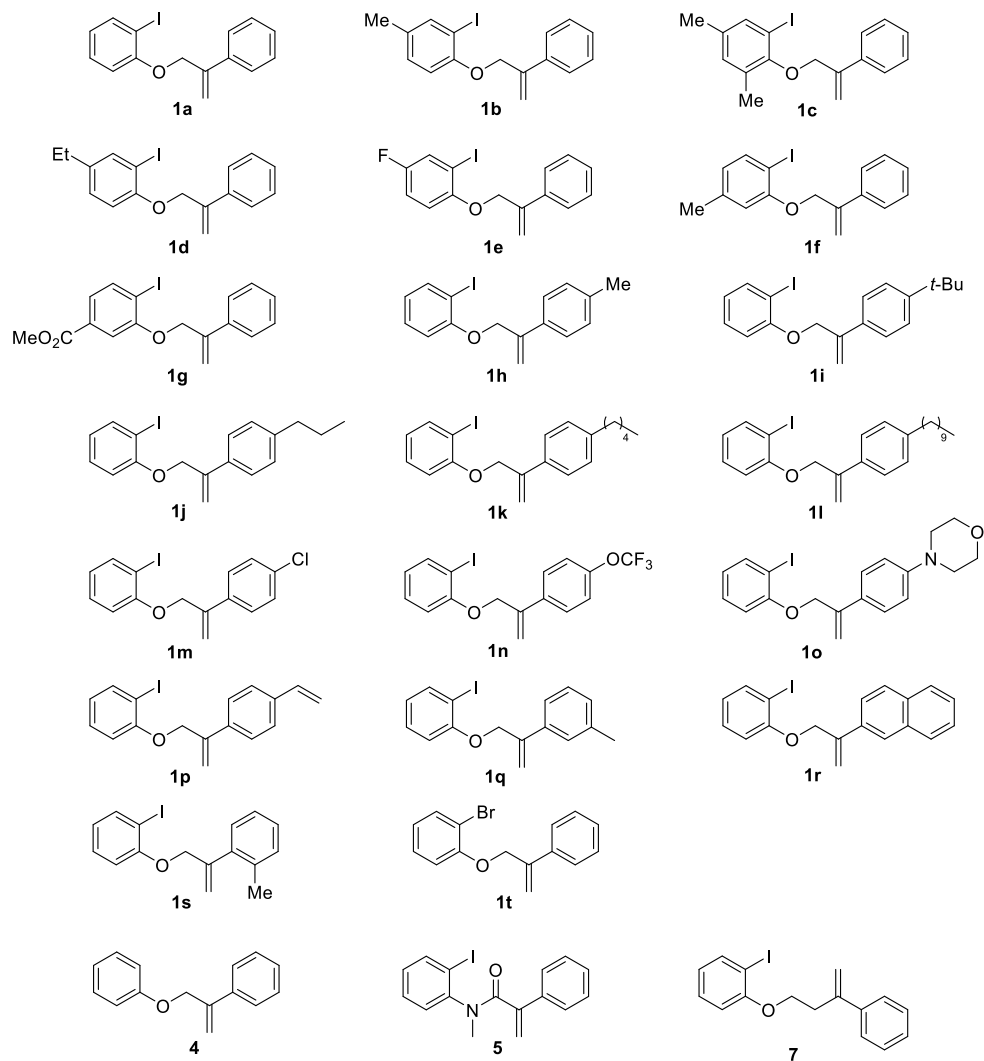

### 3 Experimental Section

#### 3.1 Preparation of Allyloxy-tethered Aryl Iodides

The substrates **1a**<sup>1</sup>, **1b**<sup>1</sup>, **1e**<sup>1</sup>, **1h**<sup>1</sup>, **1i**<sup>1</sup>, **1m**<sup>1</sup>, **1r**<sup>2</sup>, **1s**<sup>1</sup>, **1t**<sup>3</sup>, **4**<sup>4</sup>, **5**<sup>5</sup>, and **7**<sup>6</sup> synthesized are reported in previous literature.

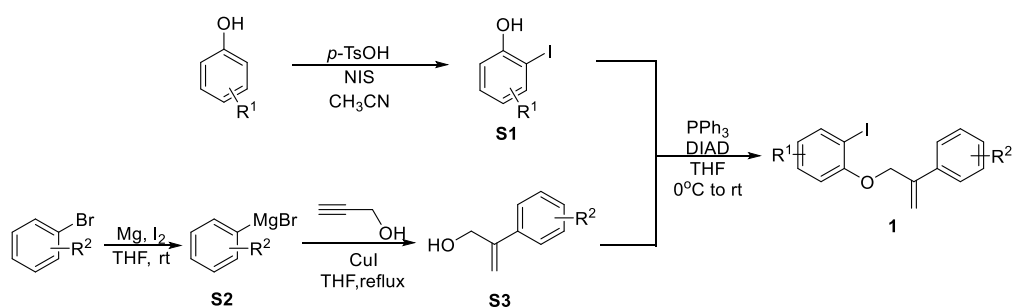

##### (1) General procedure for the synthesis of substituted-2-iodophenols **S1**<sup>7</sup>

$p$ -TsOH (10 mmol) was added to a stirred solution (solvent = 50 mL  $CH_3CN$ ) containing the phenol (10 mmol) at r.t. After 5 min, 1.1 eq. of NIS (11 mmol) was added and the mixture was stirred overnight. The reaction was monitored by GC-MS until completion and the product composition was determined by GC-MS. The major products were isolated by silica gel column chromatography (petroleum ether (PE)/ethyl acetate (EA), 20/1-10/1) and characterised by GC-MS.

##### (2) General procedure for the synthesis of allylic alcohols **S3**<sup>8</sup>

Grignard reactions (**S2**) were performed with thoroughly dried glass apparatus. Under  $N_2$  atmosphere, to a magnetically stirred mixture of Mg turnings (55 mmol, 1.1 eq.), a catalytic amount of iodine  $I_2$  (~10 mg) was added and a solution of bromobenzene (50 mmol) in dry THF (120 mL) dropwise during 30 min and allowed to stir at r.t. for 3 h.

CuI (0.57 g, 3.0 mmol) was added to the solution of  $ArMgBr$  **S2** (50 mmol) in 120 mL of THF. The mixture was stirred at r.t. for 0.5 h, and then a solution of propargyl alcohol (1.12g, 20 mmol) in 20 mL of THF was added slowly over 0.5 h. After the addition was complete, the reaction mixture was refluxed for 24 h. After cooling to r.t., an aqueous solution of saturated  $NH_4Cl$  was added slowly. The organic layer was separated, and aqueous layer was extracted with THF. The organic layer was combined, dried over anhydrous  $Na_2SO_4$ . After removal of the volatiles, the residue was purified by column chromatography (silica gel, PE/EA, 10/1-5/1) to give allylic alcohol **S3**.

##### (3) General procedure for the synthesis of substrates **1**<sup>1</sup>

To a flame-dried flask were added  $PPh_3$  (15 mmol, 1.5 eq.), aryl iodide (1.05 eq.), allylic alcohol (10 mmol, 1 eq.) and dry THF (40 mL) sequentially under  $N_2$  atmosphere at r.t. A solution of DIAD (diisopropyl azodiformate, 15 mmol, 1.5 eq.) in 10 mL of dry THF was added dropwise via addition funnel at  $0^\circ C$ . The resulting mixture was allowed to warm to r.t. naturally with stirring. After the reaction was complete as monitored by TLC, the reaction mixture was concentrated on a rotary evaporator and the residue was purified by chromatography on silica gel (eluent: PE/EA = 100/1 to 50/1) to afford the desired product **1**.

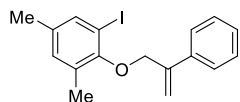

**1-iodo-3,5-dimethyl-2-((2-phenylallyl)oxy)benzene (1c)**

Light yellow liquid; yield: 75 % (eluent: PE/EA: 100/1)

$^1\text{H}$  NMR (400 MHz, Chloroform-*d*)  $\delta$  7.56 – 7.51 (m, 2H), 7.44 (d,  $J$  = 2.0 Hz, 1H), 7.38 – 7.28 (m, 3H), 6.94 (d,  $J$  = 2.1 Hz, 1H), 5.66 – 5.60 (m, 2H), 4.72 (d,  $J$  = 1.1 Hz, 2H), 2.26 (s, 3H), 2.23 (s, 3H).

$^{13}\text{C}$  NMR (101 MHz, Chloroform-*d*)  $\delta$  154.8 , 143.4 , 138.6 , 137.4 , 135.6 , 132.3 , 132.0 , 128.4 , 127.9 , 126.1 , 114.5 , 91.7 , 73.8 , 20.2 , 17.1 .

HRMS (ESI-TOF)  $m/z$ :  $[\text{M} + \text{H}]^+$  Calcd for  $\text{C}_{17}\text{H}_{18}\text{IO}$  365.0397; Found 365.0394.

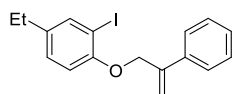

**4-ethyl-2-iodo-1-((2-phenylallyl)oxy)benzene (1d)**

Light yellow liquid; yield: 70 % (eluent: PE/EA: 100/1)

$^1\text{H}$  NMR (400 MHz, Chloroform-*d*)  $\delta$  7.61 (d,  $J$  = 2.1 Hz, 1H), 7.48 – 7.43 (m, 2H), 7.37 – 7.28 (m, 3H), 7.07 (dd,  $J$  = 8.4, 2.1 Hz, 1H), 6.75 (d,  $J$  = 8.3 Hz, 1H), 5.62 – 5.57 (m, 2H), 4.87 (d,  $J$  = 1.3 Hz, 2H), 2.53 (q,  $J$  = 7.6 Hz, 2H), 1.18 (t,  $J$  = 7.6 Hz, 3H).

$^{13}\text{C}$  NMR (101 MHz, Chloroform-*d*)  $\delta$  155.1 , 142.4 , 138.8 , 138.7 , 138.3 , 128.6 , 128.4 , 127.9 , 126.0 , 114.5 , 112.4 , 86.5 , 70.5 , 27.5 , 15.6 .

HRMS (ESI-TOF)  $m/z$ :  $[\text{M} + \text{Na}]^+$  Calcd for  $\text{C}_{17}\text{H}_{17}\text{IONa}$  387.0216; Found 387.0212.

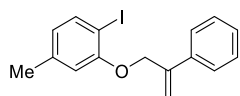

**1-iodo-4-methyl-2-((2-phenylallyl)oxy)benzene (1f)**

Light yellow liquid; yield: 74 % (eluent: PE/EA: 100/1)

$^1\text{H}$  NMR (400 MHz, Chloroform-*d*)  $\delta$  7.62 (d,  $J$  = 7.9 Hz, 1H), 7.51 – 7.46 (m, 2H), 7.40 – 7.30 (m, 3H), 6.68 (d,  $J$  = 1.8 Hz, 1H), 6.56 (dd,  $J$  = 7.9, 1.8 Hz, 1H), 5.63 (dd,  $J$  = 11.2, 1.4 Hz, 2H), 4.90 (s, 2H), 2.30 (s, 3H).

$^{13}\text{C}$  NMR (101 MHz, Chloroform-*d*)  $\delta$  156.9 , 142.4 , 139.7 , 139.0 , 138.4 , 128.5 , 128.0 , 126.1 , 123.7 , 114.6 , 113.6 , 82.5 , 70.3 , 21.4 .

HRMS (ESI-TOF)  $m/z$ :  $[\text{M} + \text{H}]^+$  Calcd for  $\text{C}_{16}\text{H}_{16}\text{IO}$  351.0240; Found 351.0237.

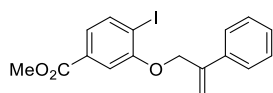

**methyl 4-iodo-3-((2-phenylallyl)oxy)benzoate (1g)**

Light yellow liquid; yield: 68 % (eluent: PE/EA: 50/1)

$^1\text{H}$  NMR (400 MHz, Chloroform-*d*)  $\delta$  7.86 (d,  $J$  = 8.1 Hz, 1H), 7.53 – 7.45 (m, 3H), 7.41 – 7.29 (m, 4H), 5.67 – 5.61 (m, 2H), 4.99 (s, 2H), 3.90 (s, 3H).

$^{13}\text{C}$  NMR (101 MHz, Chloroform-*d*)  $\delta$  166.4 , 157.1 , 142.2 , 139.6 , 138.1 , 131.5 , 128.5 , 128.1 , 126.2 , 123.5 , 115.0 , 112.6 , 93.3 , 70.6 , 52.3 .

HRMS (ESI-TOF)  $m/z$ :  $[\text{M} + \text{H}]^+$  Calcd for  $\text{C}_{17}\text{H}_{16}\text{IO}_3$  395.0139; Found 395.0135.

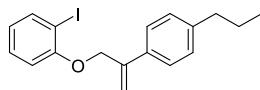

**1-iodo-2-((2-(4-propylphenyl)allyl)oxy)benzene (1j)**

Light yellow liquid; yield: 80 % (eluent: PE/EA: 100/1)

$^1\text{H}$  NMR (400 MHz, Chloroform-*d*)  $\delta$  7.78 (dd,  $J = 7.8, 1.6$  Hz, 1H), 7.39 (d,  $J = 8.2$  Hz, 2H), 7.30 – 7.25 (m, 1H), 7.17 (d,  $J = 8.2$  Hz, 2H), 6.86 (dd,  $J = 8.2, 1.3$  Hz, 1H), 6.73 – 6.69 (m, 1H), 5.58 (dd,  $J = 2.8, 1.4$  Hz, 2H), 4.92 (s, 2H), 2.61 – 2.57 (m, 2H), 1.67 – 1.62 (m, 2H), 0.94 (d,  $J = 7.4$  Hz, 3H).

$^{13}\text{C}$  NMR (101 MHz, Chloroform-*d*)  $\delta$  157.1, 142.7, 142.1, 139.5, 135.6, 129.3, 128.6, 125.9, 122.7, 113.8, 112.6, 86.6, 70.5, 37.7, 24.5, 13.8.

HRMS (ESI-TOF)  $m/z$ :  $[\text{M} + \text{H}]^+$  Calcd for  $\text{C}_{18}\text{H}_{20}\text{IO}$  379.0553; Found 379.0557.

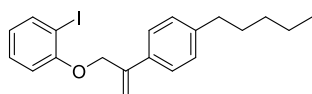

**1-iodo-2-((2-(4-pentylphenyl)allyl)oxy)benzene (1k)**

Light yellow liquid; yield: 81 % (eluent: PE/EA: 100/1)

$^1\text{H}$  NMR (400 MHz, Chloroform-*d*)  $\delta$  7.77 (dd,  $J = 7.8, 1.4$  Hz, 1H), 7.39 (d,  $J = 8.1$  Hz, 2H), 7.29 – 7.24 (m, 1H), 7.17 (d,  $J = 8.1$  Hz, 2H), 6.85 (d,  $J = 8.2$  Hz, 1H), 6.73 – 6.68 (m, 1H), 5.58 (d,  $J = 2.9$  Hz, 2H), 4.91 (s, 2H), 2.62 – 2.57 (m, 2H), 1.65 – 1.58 (m, 2H), 1.35 – 1.29 (m, 4H), 0.88 (d,  $J = 7.0$  Hz, 3H).

$^{13}\text{C}$  NMR (101 MHz, Chloroform-*d*)  $\delta$  157.1, 142.9, 142.1, 139.5, 135.6, 129.3, 128.5, 125.9, 122.7, 113.7, 112.5, 86.6, 70.5, 35.6, 31.5, 31.1, 22.5, 14.0.

HRMS (ESI-TOF)  $m/z$ :  $[\text{M} + \text{H}]^+$  Calcd for  $\text{C}_{20}\text{H}_{24}\text{IO}$  407.0866; Found 407.0869.

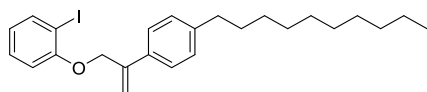

**1-((2-(4-decylphenyl)allyl)oxy)-2-iodobenzene (1l)**

Light yellow liquid; yield: 72 % (eluent: PE/EA: 100/1)

$^1\text{H}$  NMR (400 MHz, Chloroform-*d*)  $\delta$  7.78 (dd,  $J = 7.8, 1.5$  Hz, 1H), 7.39 (d,  $J = 8.2$  Hz, 2H), 7.30 – 7.25 (m, 1H), 7.17 (d,  $J = 8.1$  Hz, 2H), 6.89 – 6.84 (m, 1H), 6.74 – 6.69 (m, 1H), 5.58 (d,  $J = 3.5$  Hz, 2H), 4.92 (s, 2H), 2.63 – 2.58 (m, 2H), 1.64 – 1.57 (m, 2H), 1.26 (s, 14H), 0.88 (t,  $J = 6.8$  Hz, 3H).

$^{13}\text{C}$  NMR (101 MHz, Chloroform-*d*)  $\delta$  157.1, 143.0, 142.1, 139.5, 135.6, 129.3, 128.5, 125.9, 122.7, 113.8, 112.6, 86.6, 70.5, 35.6, 31.9, 31.4, 29.6, 29.6, 29.5, 29.3, 22.7, 14.1.

HRMS (ESI-TOF)  $m/z$ :  $[\text{M} + \text{H}]^+$  Calcd for  $\text{C}_{25}\text{H}_{34}\text{IO}$  477.1649; Found 477.1647.

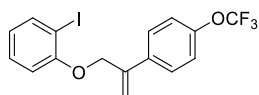

**1-iodo-2-((2-(4-(trifluoromethoxy)phenyl)allyl)oxy)benzene (1n)**

Light yellow liquid; yield: 77 % (eluent: PE/EA: 100/1)

$^1\text{H}$  NMR (300 MHz, Chloroform-*d*)  $\delta$  7.82 – 7.75 (m, 1H), 7.55 – 7.47 (m, 2H), 7.34 – 7.16 (m, 3H), 6.86 (dd,  $J = 8.2, 1.3$  Hz, 1H), 6.73 (td,  $J = 7.6, 1.3$  Hz, 1H), 5.67 – 5.57 (m, 2H), 4.90 (d,  $J = 1.4$  Hz, 2H).

$^{13}\text{C}$  NMR (75 MHz, Chloroform-*d*)  $\delta$  157.2, 149.2, 141.6, 139.9, 137.2, 129.6, 127.9, 123.2,

121.1 , 116.3 , 112.8 , 86.9 , 70.8 .

$^{19}\text{F}$  NMR (282 MHz, Chloroform-*d*)  $\delta$  -58.2 .

HRMS (ESI-TOF)  $m/z$ :  $[\text{M} + \text{H}]^+$  Calcd for  $\text{C}_{16}\text{H}_{13}\text{F}_3\text{IO}_2$  420.9907; Found 420.9914.

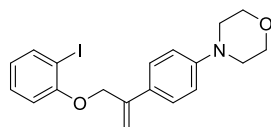

#### 4-(4-(3-(2-iodophenoxy)prop-1-en-2-yl)phenyl)morpholine (1o)

Brown solid; m.p. = 78-80 °C; yield: 66 % (eluent: PE/EA: 50/1)

$^1\text{H}$  NMR (300 MHz, Chloroform-*d*)  $\delta$  7.78 (dd,  $J = 7.8, 1.6$  Hz, 1H), 7.45 – 7.37 (m, 2H), 7.32 – 7.23 (m, 1H), 6.93 – 6.81 (m, 3H), 6.75 – 6.67 (m, 1H), 5.58 – 5.45 (m, 2H), 4.91 (d,  $J = 1.3$  Hz, 2H), 3.90 – 3.80 (m, 4H), 3.22 – 3.12 (m, 4H).

$^{13}\text{C}$  NMR (75 MHz, Chloroform-*d*)  $\delta$  157.4 , 151.2 , 141.8 , 139.8 , 129.8 , 129.6 , 127.1 , 123.0 , 115.4 , 112.8 , 112.8 , 86.9 , 70.8 , 67.1 , 49.2 .

HRMS (ESI-TOF)  $m/z$ :  $[\text{M} + \text{H}]^+$  Calcd for  $\text{C}_{19}\text{H}_{21}\text{INO}_2$  422.0611; Found 422.0609.

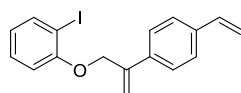

#### 1-iodo-2-((2-(4-vinylphenyl)allyl)oxy)benzene (1p)

Light yellow liquid; yield: 68 % (eluent: PE/EA: 100/1)

$^1\text{H}$  NMR (300 MHz, Chloroform-*d*)  $\delta$  7.77 (dd,  $J = 7.8, 1.6$  Hz, 1H), 7.41 (q,  $J = 8.6$  Hz, 4H), 7.31 – 7.22 (m, 1H), 6.84 (dd,  $J = 8.2, 1.4$  Hz, 1H), 6.76 – 6.62 (m, 2H), 5.75 (dd,  $J = 17.6, 0.9$  Hz, 1H), 5.68 – 5.56 (m, 2H), 5.25 (dd,  $J = 10.9, 0.9$  Hz, 1H), 4.90 (d,  $J = 1.4$  Hz, 2H).

$^{13}\text{C}$  NMR (75 MHz, Chloroform-*d*)  $\delta$  157.3 , 142.1 , 139.8 , 137.8 , 137.6 , 136.6 , 129.7 , 126.6 , 126.5 , 123.1 , 114.9 , 114.4 , 112.8 , 86.9 , 70.7 .

HRMS (ESI-TOF)  $m/z$ :  $[\text{M} + \text{H}]^+$  Calcd for  $\text{C}_{17}\text{H}_{16}\text{IO}$  363.0240; Found 363.0237.

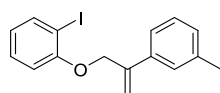

#### 1-iodo-2-((2-(m-tolyl)allyl)oxy)benzene (1q)

Light yellow liquid; yield: 81 % (eluent: PE/EA: 100/1)

$^1\text{H}$  NMR (400 MHz, Chloroform-*d*)  $\delta$  7.78 (dd,  $J = 7.8, 1.5$  Hz, 1H), 7.31 – 7.24 (m, 4H), 7.13 (d,  $J = 6.7$  Hz, 1H), 6.89 – 6.84 (m, 1H), 6.75 – 6.69 (m, 1H), 5.62 – 5.58 (m, 2H), 4.92 (s, 2H), 2.37 (s, 3H).

$^{13}\text{C}$  NMR (101 MHz, Chloroform-*d*)  $\delta$  157.1 , 142.4 , 139.5 , 138.3 , 138.0 , 129.3 , 128.8 , 128.4 , 126.9 , 123.2 , 122.7 , 114.4 , 112.6 , 86.6 , 70.5 , 21.5 .

HRMS (ESI-TOF)  $m/z$ :  $[\text{M} + \text{H}]^+$  Calcd for  $\text{C}_{16}\text{H}_{16}\text{IO}$  351.0240; Found 351.0237.

## 3.2 General Procedure for Synthesis of Products

### 3.2.1 Synthesis of phenanthrols 2

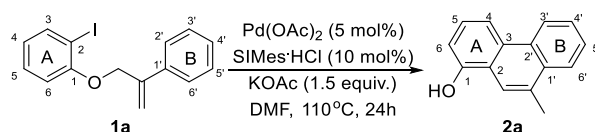

General procedure: An oven-dried Schlenk tube under a nitrogen atmosphere was charged with aryl iodide **1** (0.2 mmol, 1.0 eq.), Pd(OAc)<sub>2</sub> (5 mol%), SIMes·HCl (10 mol%) and KOAc (1.5 eq.) in DMF (1 mL). The mixture was stirred at 110 °C in an oil bath for 24 h. The resulting mixture was cooled to room temperature and filtered through a thin pad of silica gel. The filter cake was washed with ethyl acetate and the combined filtrate was washed with water. Then the organic layer was dried with Na<sub>2</sub>SO<sub>4</sub> before concentration. Then the residue was purified by flash chromatography on silica gel (PE/EA :20/1-10/1) to afford pure product.

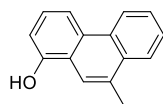

#### 9-methylphenanthren-1-ol (**2a**)

White solid; m.p. = 112-114 °C; yield: 70 % (eluent: PE/EA: 16/1).

<sup>1</sup>H NMR (400 MHz, Chloroform-*d*) δ 8.72 – 8.65 (m, 1H), 8.24 (d, *J* = 8.4 Hz, 1H), 8.09 – 8.03 (m, 1H), 7.97 (s, 1H), 7.68 – 7.60 (m, 2H), 7.40 (t, *J* = 8.0 Hz, 1H), 6.92 (d, *J* = 7.6 Hz, 1H), 5.24 (s, 1H), 2.78 – 2.72 (m, 3H).

<sup>13</sup>C NMR (101 MHz, Chloroform-*d*) δ 151.3, 132.1, 131.9, 131.2, 130.2, 126.7, 126.2, 125.7, 124.7, 123.5, 121.7, 119.5, 115.4, 110.6, 20.3.

HRMS (ESI-TOF) *m/z*: [M + H]<sup>+</sup> Calcd for C<sub>15</sub>H<sub>12</sub>O 209.0961; Found 209.0961.

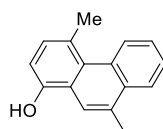

#### 4,9-dimethylphenanthren-1-ol (**2b**)

Orange solid; m.p. = 136-138 °C; yield: 39 % (eluent: PE/EA: 16/1).

<sup>1</sup>H NMR (400 MHz, Methanol-*d*<sub>4</sub>) δ 8.91 – 8.84 (m, 1H), 8.10 – 8.01 (m, 2H), 7.62 – 7.52 (m, 2H), 7.24 – 7.18 (m, 1H), 6.88 (d, *J* = 7.9 Hz, 1H), 4.91 (s, 1H), 2.96 (s, 3H), 2.68 (d, *J* = 1.1 Hz, 3H).

<sup>13</sup>C NMR (101 MHz, Methanol-*d*<sub>4</sub>) δ 151.4, 133.3, 131.7, 130.2, 130.2, 127.4, 125.4, 125.2, 124.3, 123.9, 123.1, 120.8, 109.5, 25.7, 19.0.

<sup>13</sup>C NMR (101 MHz, Methanol-*d*<sub>4</sub>) δ 151.4, 133.3, 131.7, 130.2, 130.2, 130.1, 127.4, 125.4, 125.2, 124.3, 123.9, 123.1, 120.8, 109.5, 25.7, 19.0.

HRMS (ESI-TOF) *m/z*: [M + H]<sup>+</sup> Calcd for C<sub>16</sub>H<sub>14</sub>O 223.1117; Found 223.1118.

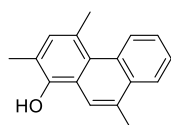

#### 2,4,9-trimethylphenanthren-1-ol (**2c**)



Yellow solid; m.p. = 70-72 °C; yield: 41 % (eluent: PE/EA: 20/1).

$^1\text{H}$  NMR (400 MHz, DMSO- $d_6$ )  $\delta$  8.84 (d,  $J$  = 10.8 Hz, 2H), 8.13 (s, 1H), 8.04 (dd,  $J$  = 6.3, 3.4 Hz, 1H), 7.62 (dd,  $J$  = 6.4, 3.3 Hz, 2H), 7.20 (s, 1H), 2.93 (s, 3H), 2.68 (s, 3H), 2.37 (s, 3H).

$^{13}\text{C}$  NMR (101 MHz, DMSO- $d_6$ )  $\delta$  148.8 , 133.8 , 132.8 , 131.9 , 130.7 , 128.3 , 127.6 , 126.0 , 125.7 , 125.6 , 124.7 , 124.3 , 121.8 , 120.6 , 26.8 , 20.5 , 16.8 .

HRMS (ESI-TOF)  $m/z$ :  $[\text{M} + \text{H}]^+$  Calcd for  $\text{C}_{17}\text{H}_{16}\text{O}$  237.1274; Found 237.1275.

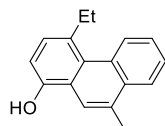

#### 4-ethyl-9-methylphenanthren-1-ol (2d)

Orange solid; m.p. = 92-94 °C; yield: 22 % (eluent: PE/EA: 16/1).

$^1\text{H}$  NMR (600 MHz, Chloroform- $d$ )  $\delta$  8.77 (dd,  $J$  = 8.2, 1.4 Hz, 1H), 8.08 (dd,  $J$  = 7.9, 1.8 Hz, 1H), 8.03 (d,  $J$  = 1.3 Hz, 1H), 7.67 – 7.57 (m, 2H), 7.30 (d,  $J$  = 7.9 Hz, 1H), 6.90 (d,  $J$  = 8.0 Hz, 1H), 5.15 (s, 1H), 3.40 (q,  $J$  = 7.4 Hz, 2H), 2.74 (d,  $J$  = 1.1 Hz, 3H), 1.48 (t,  $J$  = 7.4 Hz, 3H).

$^{13}\text{C}$  NMR (151 MHz, Chloroform- $d$ )  $\delta$  149.4 , 133.7 , 133.4 , 131.4 , 131.0 , 130.3 , 128.4 , 127.7 , 126.0 , 125.0 , 124.4 , 122.9 , 120.4 , 110.5 , 30.6 , 20.2 , 15.7 .

HRMS (ESI-TOF)  $m/z$ :  $[\text{M} + \text{H}]^+$  Calcd for  $\text{C}_{17}\text{H}_{16}\text{O}$  237.1274; Found 237.1275.

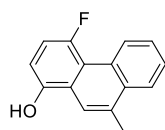

#### 4-fluoro-9-methylphenanthren-1-ol (2e)

Orange solid; m.p. = 124-126 °C; yield: 68 % (eluent: PE/EA: 16/1).

$^1\text{H}$  NMR (400 MHz, DMSO- $d_6$ )  $\delta$  10.17 (s, 1H), 9.05 – 8.96 (m, 1H), 8.14 – 8.07 (m, 1H), 8.04 – 7.96 (m, 1H), 7.71 (dd,  $J$  = 6.5, 3.1 Hz, 2H), 7.27 (dd,  $J$  = 14.6, 8.5 Hz, 1H), 7.00 (dd,  $J$  = 8.6, 3.7 Hz, 1H), 2.70 (s, 3H).

$^{13}\text{C}$  NMR (101 MHz, DMSO- $d_6$ )  $\delta$  154.2 (d,  $J$  = 241.2 Hz), 149.8 (d,  $J$  = 2.2 Hz), 132.5 (d,  $J$  = 24.9 Hz), 128.3 (d,  $J$  = 5.8 Hz), 127.8 , 127.5 , 127.5 , 127.2 (d,  $J$  = 2.6 Hz), 125.0 , 123.3 (d,  $J$  = 4.3 Hz), 120.9 (d,  $J$  = 2.3 Hz), 118.8 (d,  $J$  = 9.6 Hz), 113.0 (d,  $J$  = 26.4 Hz), 110.5 (d,  $J$  = 9.4 Hz), 20.5 .

$^{19}\text{F}$  NMR (376 MHz, DMSO- $d_6$ )  $\delta$  -121.7 .

HRMS (ESI-TOF)  $m/z$ :  $[\text{M} + \text{H}]^+$  Calcd for  $\text{C}_{15}\text{H}_{11}\text{FO}$  227.0867; Found 227.0870.

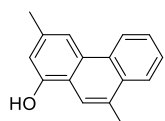

#### 3,9-dimethylphenanthren-1-ol (2f)

Yellow solid; m.p. = 118-120 °C; yield: 62 % (eluent: PE/EA: 16/1).

$^1\text{H}$  NMR (400 MHz, DMSO- $d_6$ )  $\delta$  9.92 (s, 1H), 8.66 – 8.58 (m, 1H), 7.94 – 7.82 (m, 3H), 7.56 – 7.47 (m, 2H), 6.79 (d,  $J$  = 1.3 Hz, 1H), 2.56 (d,  $J$  = 1.1 Hz, 3H), 2.38 (s, 3H).

$^{13}\text{C}$  NMR (101 MHz, DMSO- $d_6$ )  $\delta$  153.6 , 136.2 , 132.2 , 131.0 , 130.1 , 129.7 , 127.0 , 126.5 ,

125.0 , 124.0 , 120.8 , 120.1 , 113.7 , 112.4 , 22.4 , 20.3 .

HRMS (ESI-TOF)  $m/z$ :  $[M + H]^+$  Calcd for  $C_{16}H_{14}O$  223.1117; Found 223.1119.

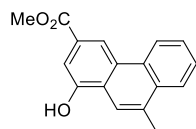

**methyl 1-hydroxy-9-methylphenanthrene-3-carboxylate (2g)**

Yellow solid; m.p. = 138-140 °C; yield: 38 % (eluent: PE/EA: 10/1).

$^1H$  NMR (400 MHz, DMSO- $d_6$ )  $\delta$  10.57 (s, 1H), 8.83 – 8.76 (m, 2H), 8.12 – 8.07 (m, 1H), 8.00 (s, 1H), 7.76 – 7.69 (m, 2H), 7.57 (d,  $J$  = 1.4 Hz, 1H), 3.93 (s, 3H), 2.72 (d,  $J$  = 1.1 Hz, 3H).

$^{13}C$  NMR (101 MHz, DMSO- $d_6$ )  $\delta$  167.1 , 153.9 , 134.3 , 132.2 , 130.4 , 130.2 , 127.8 , 127.6 , 127.6 , 125.3 , 125.1 , 123.9 , 120.4 , 115.6 , 109.9 , 52.7 , 20.5 .

HRMS (ESI-TOF)  $m/z$ :  $[M + H]^+$  Calcd for  $C_{17}H_{15}O_3$  267.1016; Found 267.1015.

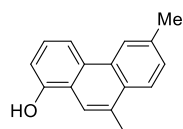

**6,9-dimethylphenanthren-1-ol (2h)**

Light yellow solid; m.p. = 106-108 °C; yield: 66 % (eluent: PE/EA: 16/1).

$^1H$  NMR (400 MHz, Chloroform- $d$ )  $\delta$  8.47 – 8.43 (m, 1H), 8.21 (d,  $J$  = 8.4 Hz, 1H), 7.95 – 7.86 (m, 2H), 7.45 (dd,  $J$  = 8.4, 1.7 Hz, 1H), 7.36 (dd,  $J$  = 8.4, 7.6 Hz, 1H), 6.89 (dd,  $J$  = 7.6, 0.9 Hz, 1H), 5.42 (s, 1H), 2.71 (d,  $J$  = 1.1 Hz, 3H), 2.60 (s, 3H).

$^{13}C$  NMR (101 MHz, Chloroform- $d$ )  $\delta$  151.2 , 135.8 , 131.8 , 130.9 , 130.1 , 130.0 , 128.3 , 125.4 , 124.5 , 123.2 , 121.8 , 118.6 , 115.2 , 110.5 , 21.9 , 20.3 .

HRMS (ESI-TOF)  $m/z$ :  $[M + H]^+$  Calcd for  $C_{16}H_{14}O$  223.1117; Found 223.1118.

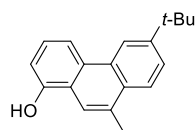

**6-(tert-butyl)-9-methylphenanthren-1-ol (2i)**

Orange liquid; yield: 68 % (eluent: PE/EA: 16/1).

$^1H$  NMR (400 MHz, Methanol- $d_4$ )  $\delta$  8.66 (d,  $J$  = 2.0 Hz, 1H), 8.16 (d,  $J$  = 8.4 Hz, 1H), 7.98 – 7.87 (m, 2H), 7.65 (dd,  $J$  = 8.6, 2.0 Hz, 1H), 7.37 (t,  $J$  = 8.0 Hz, 1H), 6.97 – 6.91 (m, 1H), 4.90 (s, 1H), 2.67 (s, 3H), 1.45 (s, 9H).

$^{13}C$  NMR (101 MHz, Methanol- $d_4$ )  $\delta$  153.2 , 148.4 , 131.2 , 130.2 , 129.9 , 129.9 , 125.5 , 124.3 , 124.0 , 122.3 , 119.3 , 118.6 , 113.2 , 109.5 , 34.5 , 30.6 , 18.9 .

HRMS (ESI-TOF)  $m/z$ :  $[M + H]^+$  Calcd for  $C_{19}H_{20}O$  265.1587; Found 265.1588.

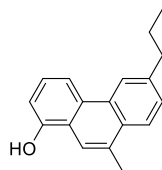

### 9-methyl-6-propylphenanthren-1-ol (2j)

Orange solid; m.p. = 118-120 °C; yield: 63 % (eluent: PE/EA: 16/1).

$^1\text{H}$  NMR (400 MHz, Methanol- $d_4$ )  $\delta$  8.50 – 8.43 (m, 1H), 8.15 (d,  $J$  = 8.4 Hz, 1H), 8.00 – 7.87 (m, 2H), 7.42 (dd,  $J$  = 8.4, 1.7 Hz, 1H), 7.35 (t,  $J$  = 8.0 Hz, 1H), 6.97 – 6.90 (m, 1H), 4.89 (s, 1H), 2.81 (t,  $J$  = 7.6 Hz, 2H), 2.68 (d,  $J$  = 1.1 Hz, 3H), 1.76 (h,  $J$  = 7.4 Hz, 2H), 0.99 (t,  $J$  = 7.3 Hz, 3H).

$^{13}\text{C}$  NMR (101 MHz, Methanol- $d_4$ )  $\delta$  153.1, 140.2, 130.9, 130.4, 130.3, 130.2, 127.1, 125.5, 124.1, 122.3, 122.2, 119.2, 113.3, 109.6, 38.0, 24.6, 19.0, 12.8.

HRMS (ESI-TOF)  $m/z$ :  $[\text{M} + \text{H}]^+$  Calcd for  $\text{C}_{18}\text{H}_{18}\text{O}$  251.1430; Found 251.1432.

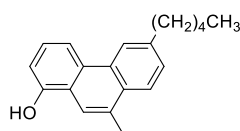

### 9-methyl-6-pentylphenanthren-1-ol (2k)

Orange solid; m.p. = 68-70 °C; yield: 62 % (eluent: PE/EA: 16/1).

$^1\text{H}$  NMR (400 MHz, Methanol- $d_4$ )  $\delta$  8.42 (d,  $J$  = 1.7 Hz, 1H), 8.13 (d,  $J$  = 8.4 Hz, 1H), 7.95 (s, 1H), 7.88 (d,  $J$  = 8.4 Hz, 1H), 7.39 – 7.31 (m, 2H), 6.94 (d,  $J$  = 7.6 Hz, 1H), 4.91 (s, 1H), 2.76 (t,  $J$  = 7.7 Hz, 2H), 2.68 – 2.62 (m, 3H), 1.73 – 1.62 (m, 2H), 1.38 – 1.28 (m, 4H), 0.91 – 0.83 (m, 3H).

$^{13}\text{C}$  NMR (101 MHz, Methanol- $d_4$ )  $\delta$  153.1, 140.4, 130.9, 130.4, 130.3, 130.2, 127.0, 125.5, 124.1, 122.2, 119.2, 113.3, 109.6, 35.9, 31.3, 31.2, 22.3, 19.0, 13.1.

HRMS (ESI-TOF)  $m/z$ :  $[\text{M} + \text{H}]^+$  Calcd for  $\text{C}_{20}\text{H}_{22}\text{O}$  279.1743; Found 279.1745.

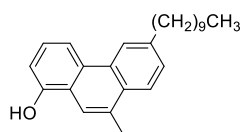

### 6-decyl-9-methylphenanthren-1-ol (2l)

Orange solid; m.p. = 64-66 °C; yield: 60 % (eluent: PE/EA: 16/1).

$^1\text{H}$  NMR (400 MHz, Methanol- $d_4$ )  $\delta$  8.43 (d,  $J$  = 1.6 Hz, 1H), 8.14 (d,  $J$  = 8.4 Hz, 1H), 7.97 (s, 1H), 7.89 (d,  $J$  = 8.4 Hz, 1H), 7.39 – 7.32 (m, 2H), 6.95 (dd,  $J$  = 7.7, 0.8 Hz, 1H), 4.92 (s, 1H), 2.77 (t,  $J$  = 7.7 Hz, 2H), 2.67 (d,  $J$  = 1.2 Hz, 3H), 1.71 – 1.62 (m, 2H), 1.32 – 1.17 (m, 15H), 0.86 (t,  $J$  = 6.9 Hz, 3H).

$^{13}\text{C}$  NMR (101 MHz, Methanol- $d_4$ )  $\delta$  153.1, 140.3, 131.0, 130.3, 130.3, 130.2, 127.0, 125.5, 124.1, 122.2, 119.2, 113.4, 109.6, 35.9, 31.7, 31.5, 29.4, 29.4, 29.3, 29.1, 29.0, 22.4, 19.1, 13.1.

HRMS (ESI-TOF)  $m/z$ :  $[\text{M} + \text{H}]^+$  Calcd for  $\text{C}_{25}\text{H}_{32}\text{O}$  349.2526; Found 349.2527.

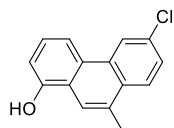

#### 6-chloro-9-methylphenanthren-1-ol (2m)

Yellow solid; m.p. = 140-142 °C; yield: 71 % (eluent: PE/EA: 16/1).

<sup>1</sup>H NMR (400 MHz, DMSO-*d*<sub>6</sub>) δ 10.23 (s, 1H), 8.77 (d, *J* = 2.2 Hz, 1H), 8.18 (d, *J* = 8.4 Hz, 1H), 8.03 – 7.95 (m, 2H), 7.61 (dd, *J* = 8.8, 2.1 Hz, 1H), 7.42 (t, *J* = 8.0 Hz, 1H), 7.09 (d, *J* = 7.7 Hz, 1H), 2.64 (d, *J* = 1.2 Hz, 3H).

<sup>13</sup>C NMR (101 MHz, DMSO-*d*<sub>6</sub>) δ 153.7 , 131.8 , 131.8 , 130.5 , 130.5 , 130.1 , 127.2 , 127.2 , 127.1 , 123.3 , 122.5 , 121.3 , 114.1 , 111.5 , 20.2 .

HRMS (ESI-TOF) *m/z*: [M + H]<sup>+</sup> Calcd for C<sub>15</sub>H<sub>11</sub>ClO 243.0571; Found 243.0572.

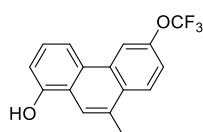

#### 9-methyl-6-(trifluoromethoxy)phenanthren-1-ol (2n)

Orange solid; m.p. = 132-134 °C; yield: 70 % (eluent: PE/EA: 10/1).

<sup>1</sup>H NMR (400 MHz, Methanol-*d*<sub>4</sub>) δ 8.43 (dd, *J* = 2.3, 1.1 Hz, 1H), 8.02 – 7.95 (m, 3H), 7.46 – 7.38 (m, 1H), 7.36 (t, *J* = 8.1 Hz, 1H), 6.97 (dd, *J* = 7.7, 0.8 Hz, 1H), 4.91 (s, 1H), 2.62 (s, 2H).

<sup>13</sup>C NMR (101 MHz, Methanol-*d*<sub>4</sub>) δ 154.7 , 148.5 , 132.8 , 131.9 , 131.7 , 131.3 , 127.7 , 127.6 , 123.9 , 122.2 , 120.4 , 116.1 , 114.6 , 111.8 , 20.2 .

<sup>13</sup>C NMR (101 MHz, Methanol-*d*<sub>4</sub>) δ 154.7 , 148.5 , 132.8 , 131.9 , 131.7 , 131.3 , 127.7 , 127.6 , 123.9 , 123.4 , 122.2 , 120.9 , 120.4 , 116.1 , 114.6 , 111.8 , 20.2 .

<sup>19</sup>F NMR (376 MHz, Methanol-*d*<sub>4</sub>) δ -59.09 .

HRMS (ESI-TOF) *m/z*: [M + H]<sup>+</sup> Calcd for C<sub>16</sub>H<sub>11</sub>F<sub>3</sub>O<sub>2</sub> 293.0784; Found 293.0786.

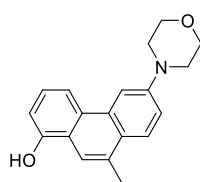

#### 9-methyl-6-morpholinophenanthren-1-ol (2o)

Orange solid; m.p. > 150 °C; yield: 65 % (eluent: PE/EA: 5/1).

<sup>1</sup>H NMR (400 MHz, DMSO-*d*<sub>6</sub>) δ 9.99 (s, 1H), 8.18 (d, *J* = 8.4 Hz, 1H), 8.04 (d, *J* = 2.5 Hz, 1H), 7.88 (d, *J* = 9.0 Hz, 1H), 7.76 (s, 1H), 7.38 – 7.32 (m, 2H), 6.99 (d, *J* = 7.6 Hz, 1H), 3.84 – 3.79 (m, 4H), 3.35 – 3.28 (m, 4H), 2.63 (d, *J* = 1.1 Hz, 3H).

<sup>13</sup>C NMR (101 MHz, DMSO-*d*<sub>6</sub>) δ 153.6 , 149.8 , 131.5 , 130.7 , 130.7 , 126.1 , 125.9 , 125.7 , 122.6 , 117.8 , 117.4 , 114.1 , 110.6 , 107.2 , 66.6 , 49.1 , 20.3 .

HRMS (ESI-TOF) *m/z*: [M + H]<sup>+</sup> Calcd for C<sub>19</sub>H<sub>19</sub>NO<sub>2</sub> 294.1489; Found 294.1491.

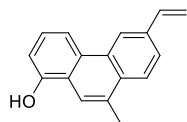

**9-methyl-6-vinylphenanthren-1-ol (2p)**

White solid; m.p. = 146-148 °C; yield: 36 % (eluent: PE/EA: 16/1).

<sup>1</sup>H NMR (400 MHz, DMSO-*d*<sub>6</sub>) δ 10.14 (s, 1H), 8.77 (d, *J* = 1.9 Hz, 1H), 8.26 (d, *J* = 8.3 Hz, 1H), 8.03 – 7.94 (m, 2H), 7.83 (dd, *J* = 8.5, 1.6 Hz, 1H), 7.43 (t, *J* = 8.0 Hz, 1H), 7.07 – 6.97 (m, 2H), 6.08 (d, *J* = 17.6 Hz, 1H), 5.39 (d, *J* = 11.0 Hz, 1H), 2.68 (s, 3H).

<sup>13</sup>C NMR (101 MHz, DMSO-*d*<sub>6</sub>) δ 153.7, 137.4, 135.4, 131.7, 131.1, 130.7, 130.5, 126.9, 125.4, 124.2, 122.6, 122.3, 120.9, 115.3, 114.0, 110.9, 20.3.

HRMS (ESI-TOF) *m/z*: [M + H]<sup>+</sup> Calcd for C<sub>17</sub>H<sub>14</sub>O 235.1117; Found 235.1119.

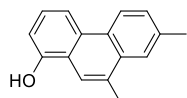

**7,9-dimethylphenanthren-1-ol (2q)**

White solid; m.p. = 136-138 °C; yield: 59 % (eluent: PE/EA: 16/1).

<sup>1</sup>H NMR (400 MHz, Methanol-*d*<sub>4</sub>) δ 8.46 (d, *J* = 8.5 Hz, 1H), 8.03 (d, *J* = 8.4 Hz, 1H), 8.00 – 7.94 (m, 1H), 7.77 – 7.71 (m, 1H), 7.37 – 7.28 (m, 2H), 6.92 (dd, *J* = 7.7, 0.9 Hz, 1H), 4.92 (s, 1H), 2.63 (d, *J* = 1.2 Hz, 3H), 2.48 (s, 3H).

<sup>13</sup>C NMR (101 MHz, Methanol-*d*<sub>4</sub>) δ 153.1, 135.8, 132.1, 131.1, 130.2, 128.1, 127.3, 125.6, 123.7, 123.0, 121.7, 120.0, 113.2, 109.3, 20.4, 19.1.

HRMS (ESI-TOF) *m/z*: [M + H]<sup>+</sup> Calcd for C<sub>16</sub>H<sub>14</sub>O 223.1117; Found 223.1118.

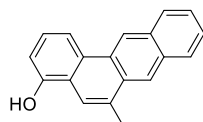

**6-methyltetraphen-4-ol (2r)**

White solid; m.p. > 150 °C; yield: 61 % (eluent: PE/EA: 16/1).

<sup>1</sup>H NMR (400 MHz, DMSO-*d*<sub>6</sub>) δ 10.06 (s, 1H), 9.28 (s, 1H), 8.50 (s, 1H), 8.28 (d, *J* = 8.3 Hz, 1H), 8.15 – 8.05 (m, 2H), 7.84 (s, 1H), 7.52 – 7.45 (m, 2H), 7.37 (t, *J* = 8.0 Hz, 1H), 7.00 (dd, *J* = 7.7, 0.8 Hz, 1H), 2.68 (d, *J* = 1.2 Hz, 3H).

<sup>13</sup>C NMR (101 MHz, DMSO-*d*<sub>6</sub>) δ 153.9, 131.9, 131.7, 131.4, 130.9, 130.9, 129.1, 128.6, 128.4, 127.2, 126.4, 126.2, 123.5, 122.9, 121.4, 120.8, 114.3, 112.1, 20.6.

HRMS (ESI-TOF) *m/z*: [M + H]<sup>+</sup> Calcd for C<sub>19</sub>H<sub>14</sub>O 259.1117; Found 259.1119.

### 3.2.2 Synthesis of fused polycycle **5**

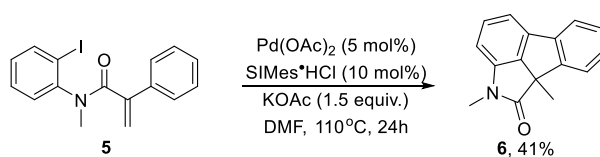

An oven-dried Schlenk tube under a nitrogen atmosphere was charged with aryl iodide **5** (0.2 mmol, 1.0 eq.), Pd(OAc)<sub>2</sub> (5 mol%), SiMes<sub>3</sub>•HCl (10 mol%) and KOAc (1.5 eq.) in DMF (1 mL). The mixture was stirred at 110 °C in an oil bath for 24 h. The resulting mixture was cooled to room temperature and filtered through a thin pad of silica gel. The filter cake was washed with ethyl acetate and the combined filtrate was washed with water. Then the organic layer was dried with Na<sub>2</sub>SO<sub>4</sub> before concentration. Then the residue was purified by flash chromatography on silica gel to afford pure product.

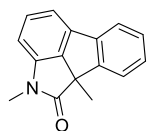

#### **2,9b-dimethyl-2,9b-dihydro-1H-indeno[1,2,3-cd]indol-1-one (6)**

Light yellow liquid; yield: 41 % (eluent: PE/EA: 20/1).

<sup>1</sup>H NMR (400 MHz, Chloroform-*d*) δ 7.66 (d, *J* = 7.5 Hz, 1H), 7.58 (d, *J* = 7.5 Hz, 1H), 7.36 – 7.30 (m, 1H), 7.30 – 7.16 (m, 3H), 6.60 (d, *J* = 7.5 Hz, 1H), 3.13 (s, 3H), 1.79 (s, 3H).

<sup>13</sup>C NMR (101 MHz, Chloroform-*d*) δ 181.8, 150.3, 146.7, 145.0, 142.7, 142.7, 131.5, 128.0, 126.9, 125.0, 122.1, 115.7, 106.9, 57.2, 26.9, 26.8.

HRMS (ESI-TOF) *m/z*: [M + H]<sup>+</sup> Calcd for C<sub>16</sub>H<sub>13</sub>NO 236.1070; Found 236.1070.

### 3.2.3 Synthesis of fused polycycle **7**

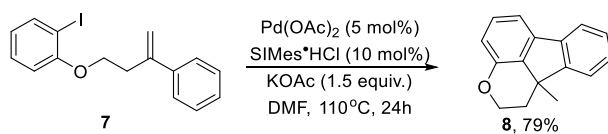

An oven-dried Schlenk tube under a nitrogen atmosphere was charged with aryl iodide **7** (0.2 mmol, 1.0 eq.), Pd(OAc)<sub>2</sub> (5 mol%), SIMes•HCl (10 mol%) and KOAc (1.5 eq.) in DMF (1 mL). The mixture was stirred at 110 °C in an oil bath for 24 h. The resulting mixture was cooled to room temperature and filtered through a thin pad of silica gel. The filter cake was washed with ethyl acetate and the combined filtrate was washed with water. Then the organic layer was dried with Na<sub>2</sub>SO<sub>4</sub> before concentration. Then the residue was purified by flash chromatography on silica gel to afford pure product.

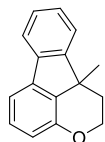

#### **10b-methyl-1,10b-dihydro-2H-indeno[1,2,3-de]chromene (8)**

White solid; m.p. = 50-52 °C; yield: 79 % (eluent: PE/EA: 50/1).

<sup>1</sup>H NMR (400 MHz, Chloroform-*d*) δ 7.69 (d, *J* = 7.5 Hz, 1H), 7.42 (d, *J* = 7.4 Hz, 1H), 7.33 (t, *J* = 7.4 Hz, 1H), 7.30 – 7.19 (m, 3H), 6.72 (t, *J* = 4.4 Hz, 1H), 4.70 – 4.58 (m, 1H), 4.58 – 4.49 (m, 1H), 2.29 (dd, *J* = 13.1, 3.9 Hz, 1H), 1.64 (td, *J* = 13.1, 6.2 Hz, 1H), 1.44 (s, 3H).

<sup>13</sup>C NMR (101 MHz, Chloroform-*d*) δ 153.7, 152.8, 140.5, 140.2, 134.7, 129.4, 127.4, 127.0, 123.0, 121.1, 113.6, 112.4, 65.5, 42.5, 30.9, 25.5.

HRMS (ESI-TOF) *m/z*: [M + H]<sup>+</sup> Calcd for C<sub>16</sub>H<sub>14</sub>O 223.1117; Found 223.1118.

## 4 NMR Spectra

$^1\text{H}$  NMR (400 MHz, Chloroform-*d*)

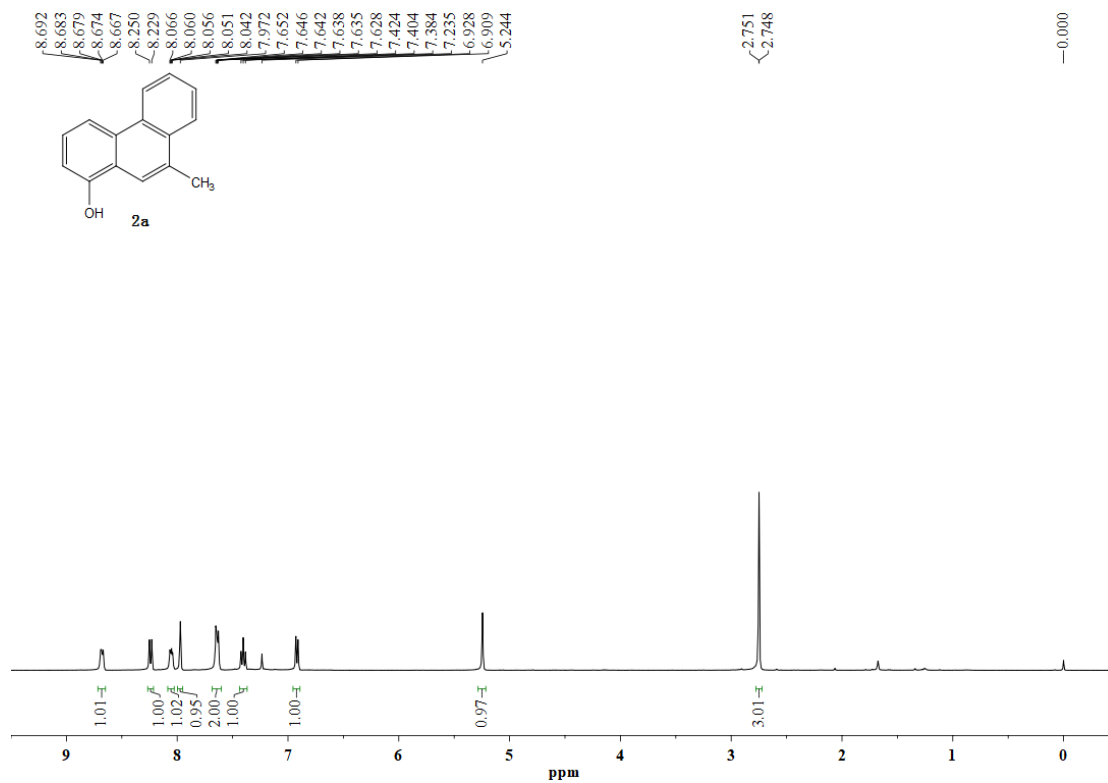

$^{13}\text{C}$  NMR (101 MHz, Chloroform-*d*)

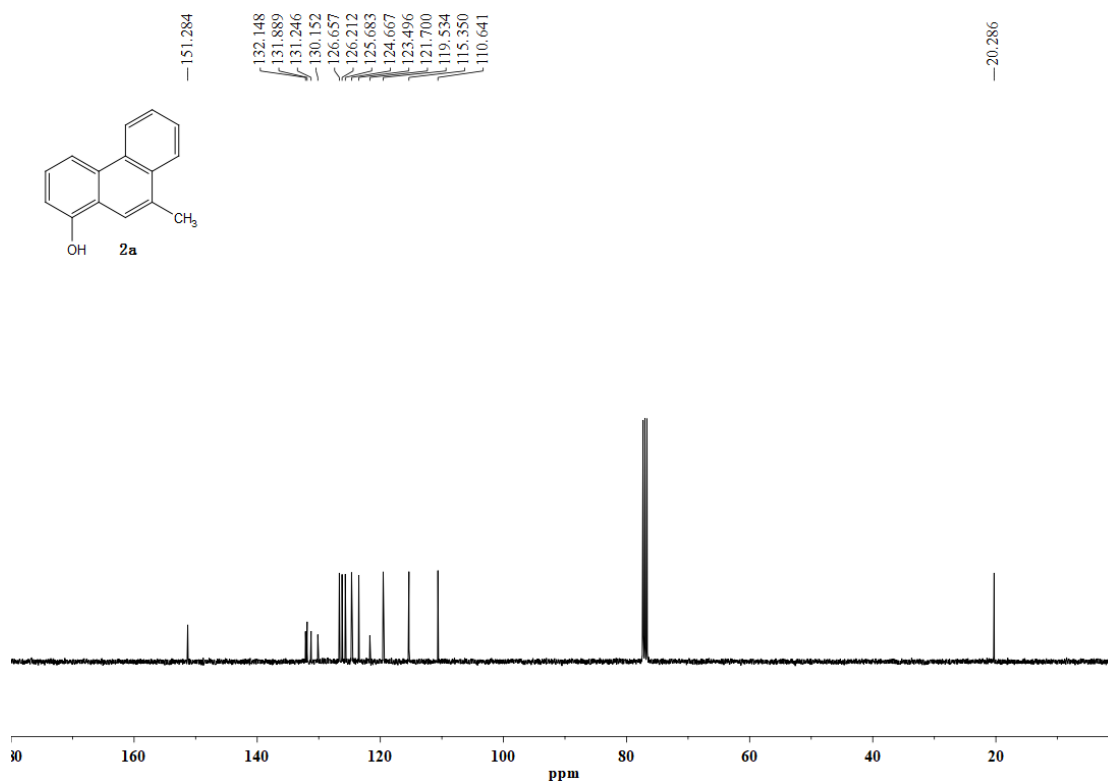



<sup>1</sup>H NMR (400 MHz, Methanol-d<sub>4</sub>)

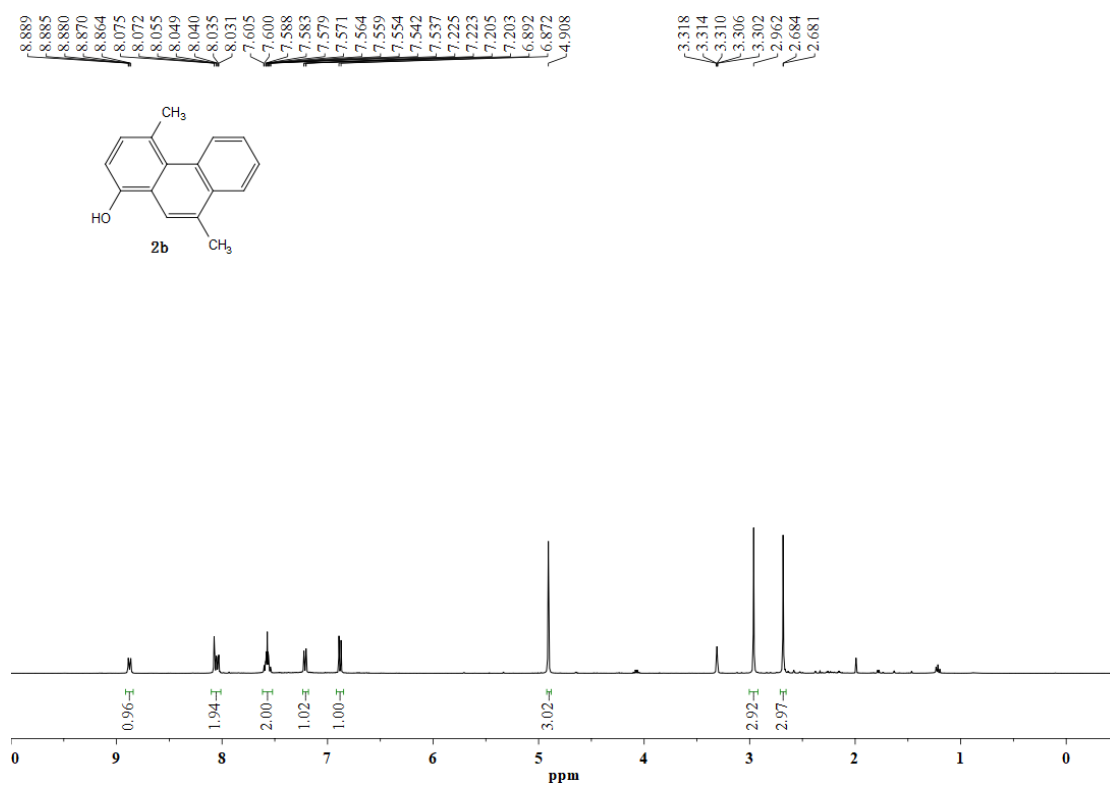

<sup>13</sup>C NMR (101 MHz, Methanol-d<sub>4</sub>)

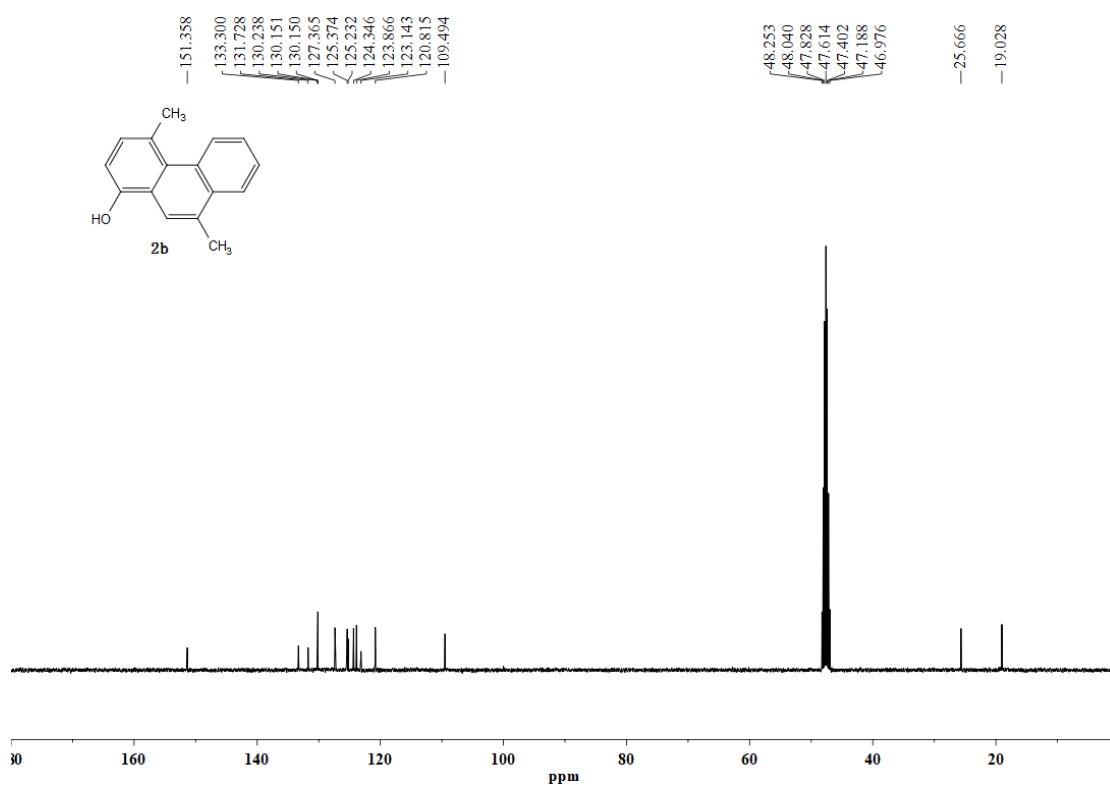

<sup>1</sup>H NMR (400 MHz, DMSO-*d*<sub>6</sub>)

8.852  
8.841  
8.833  
8.825  
8.127  
8.054  
8.045  
8.038  
8.029  
7.635  
7.626  
7.619  
7.610  
7.202

-3.431  
2.930  
2.679  
2.501  
2.374

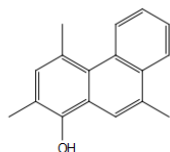

2c

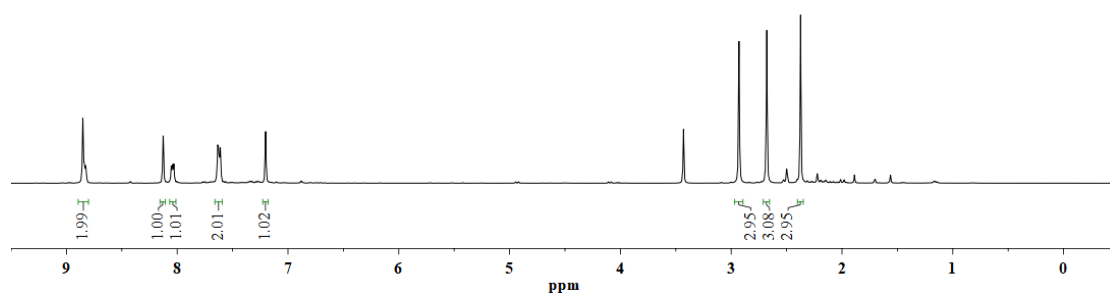

<sup>13</sup>C NMR (101 MHz, DMSO-*d*<sub>6</sub>)

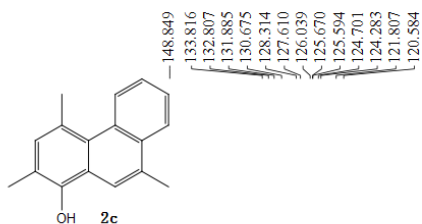

2c

148.849  
133.816  
132.807  
131.885  
130.675  
128.314  
127.610  
126.039  
125.670  
125.594  
124.701  
124.283  
121.807  
120.584

26.759  
20.519  
16.826

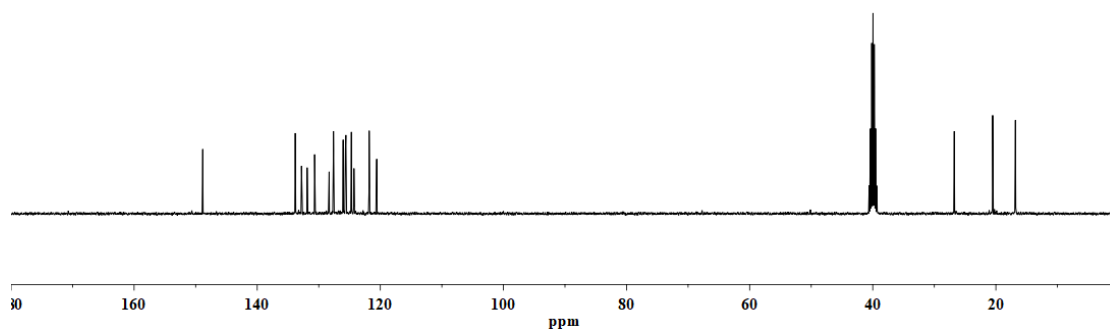

<sup>1</sup>H NMR (600 MHz, Chloroform-*d*)

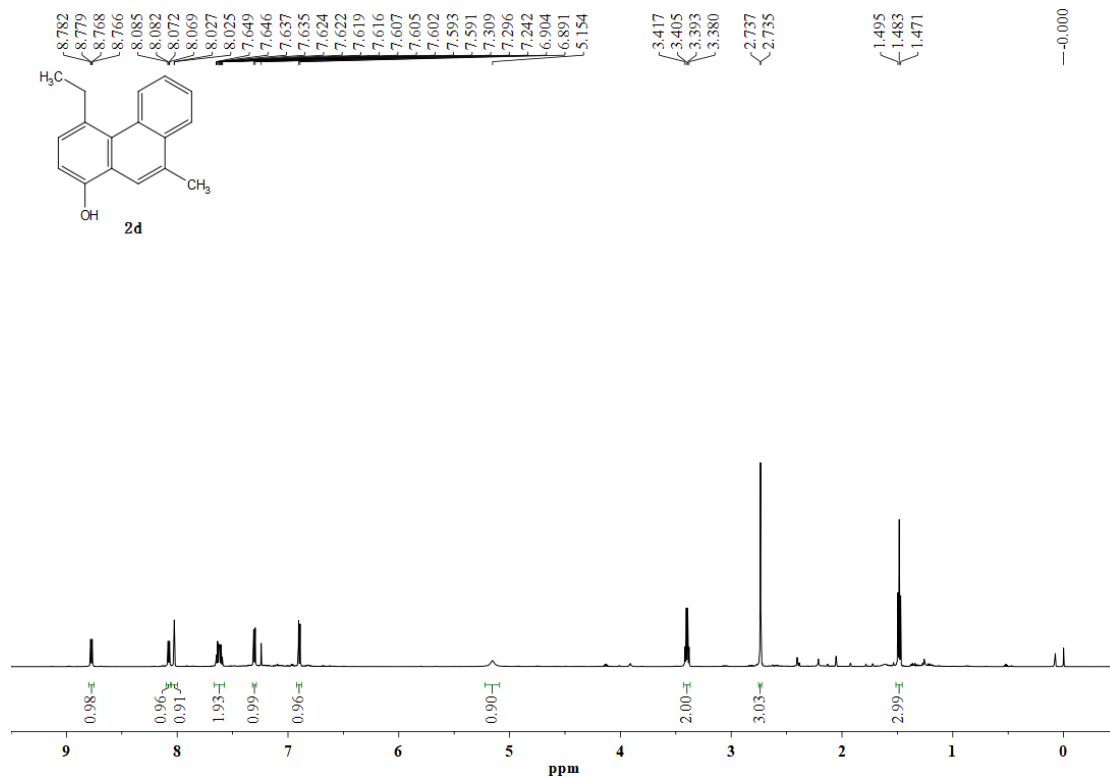

<sup>13</sup>C NMR (151 MHz, Chloroform-*d*)

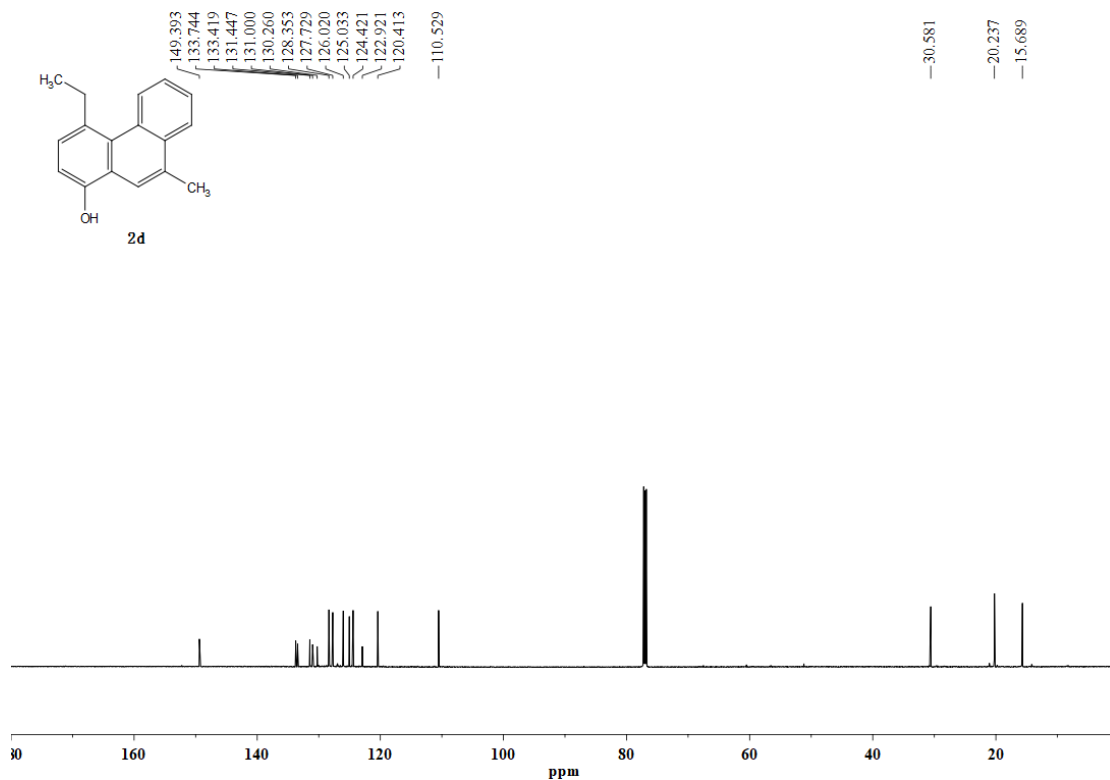

<sup>1</sup>H NMR (400 MHz, DMSO-*d*<sub>6</sub>)

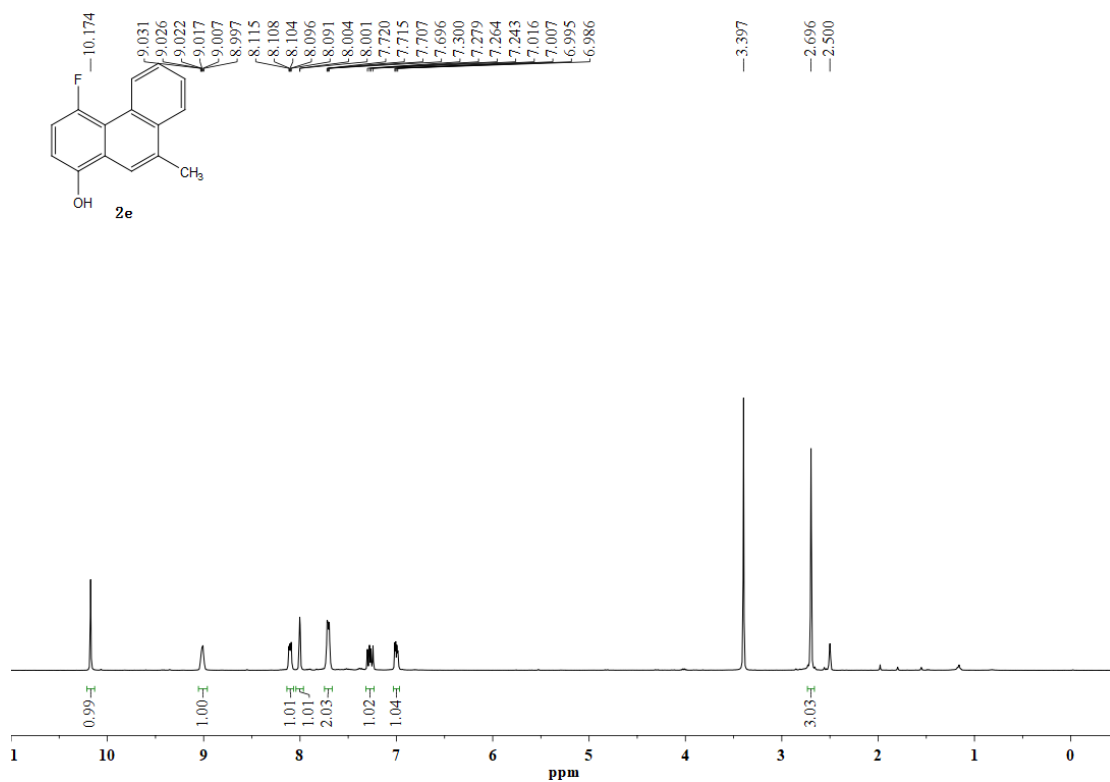

<sup>13</sup>C NMR (101 MHz, DMSO-*d*<sub>6</sub>)

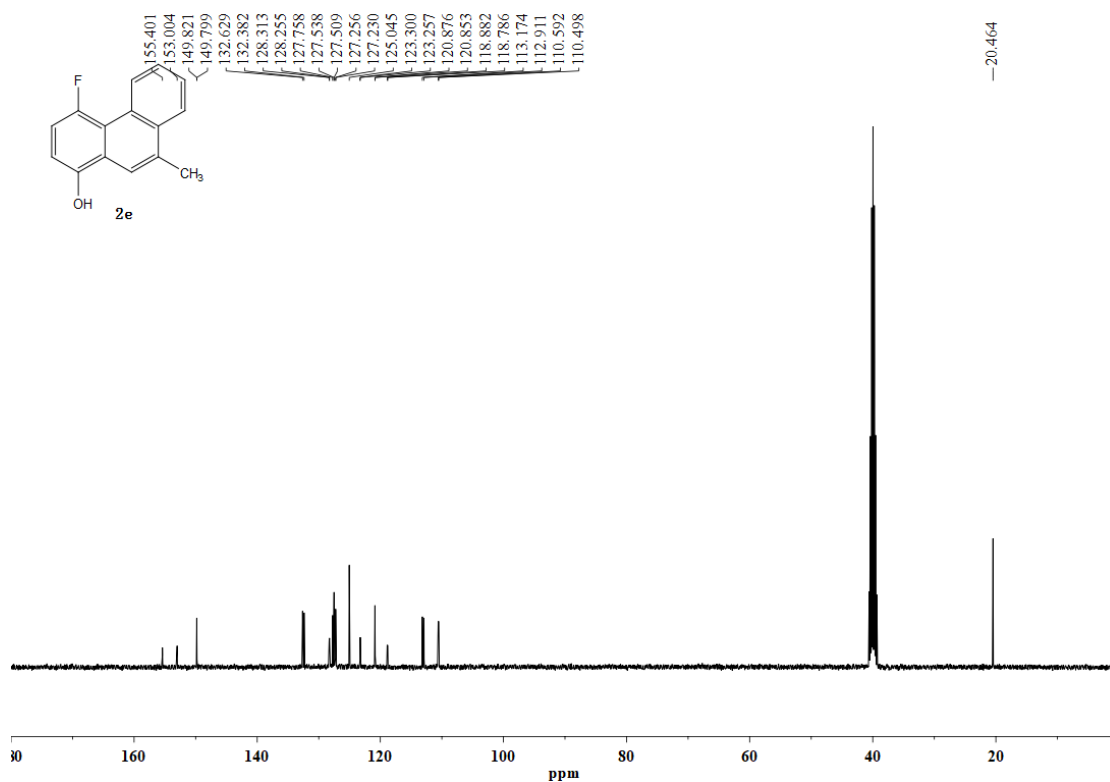

$^{19}\text{F}$  NMR (376 MHz,  $\text{DMSO-}d_6$ )

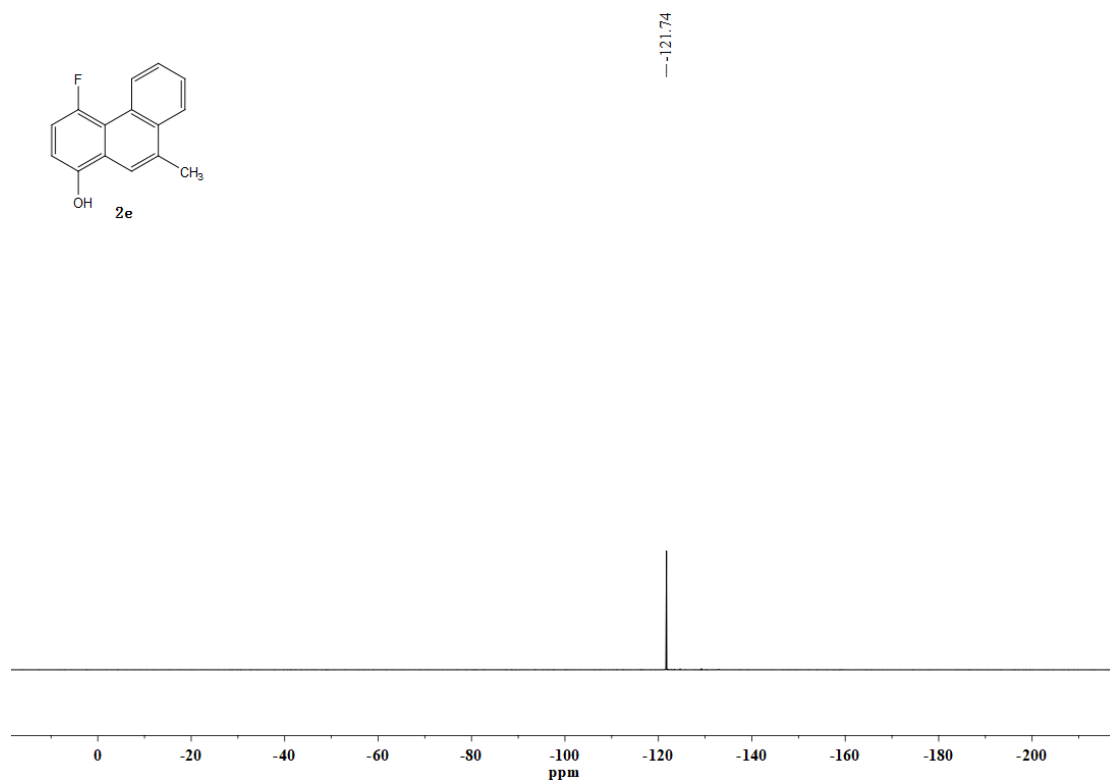

$^1\text{H}$  NMR (400 MHz,  $\text{DMSO-}d_6$ )

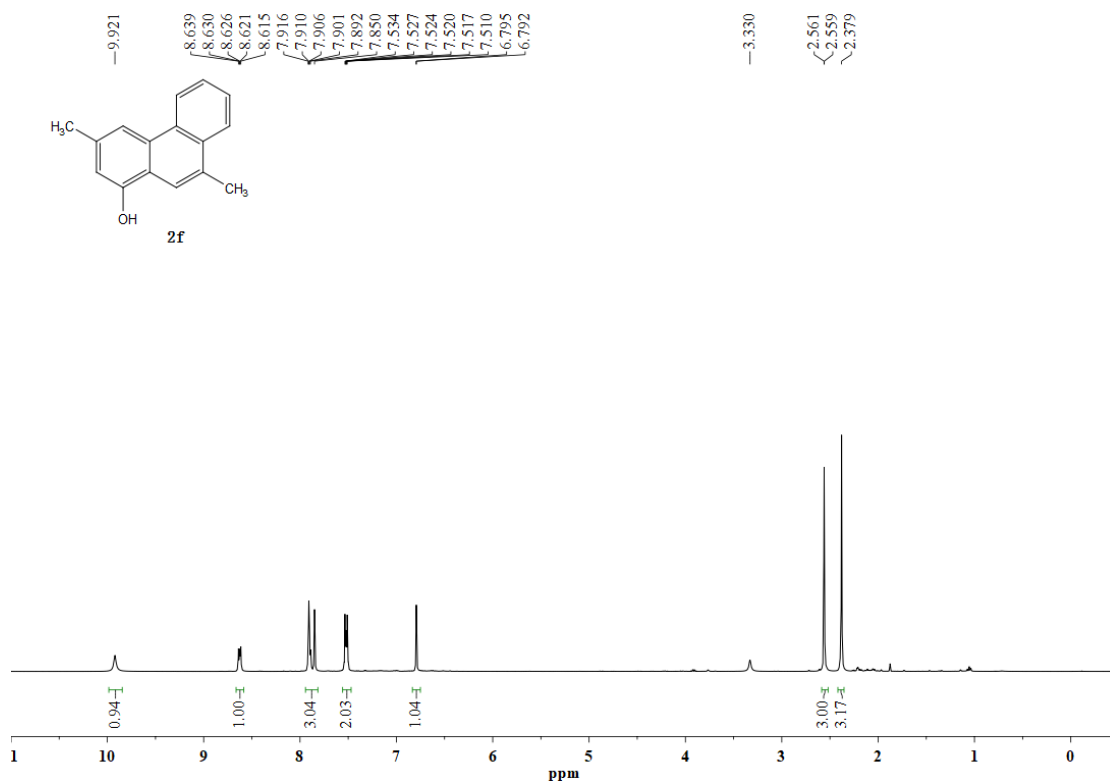

$^{13}\text{C}$  NMR (101 MHz,  $\text{DMSO-}d_6$ )

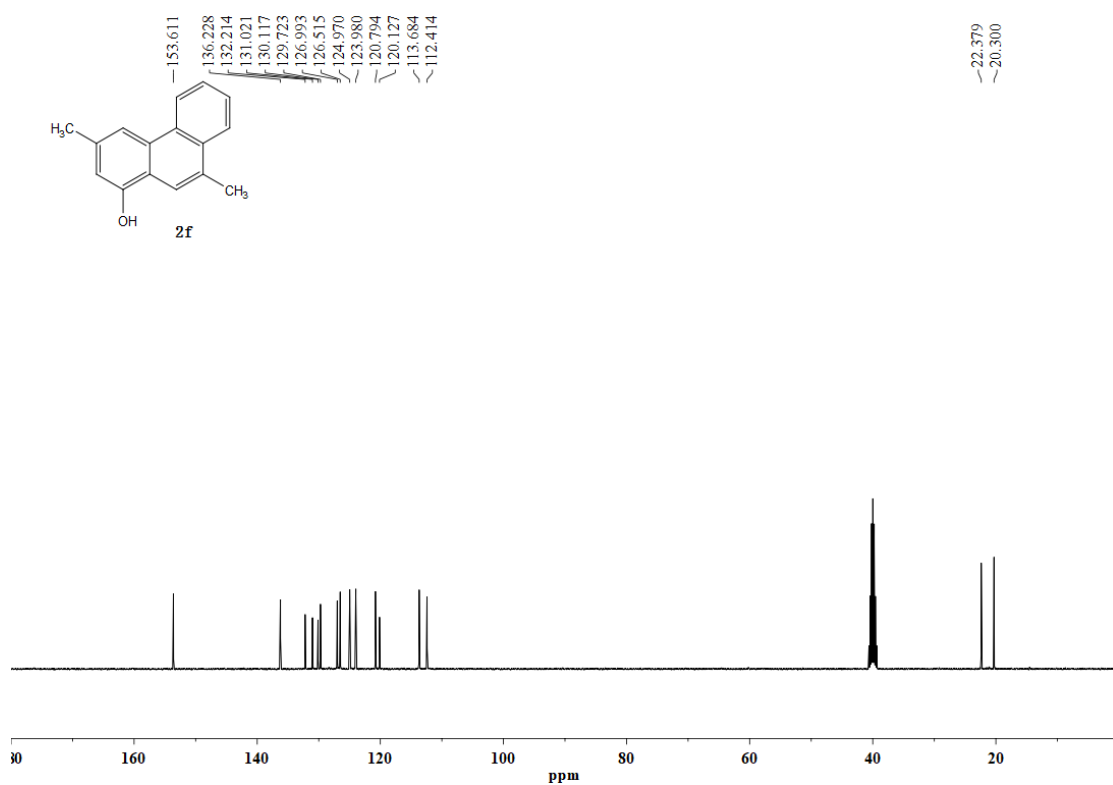

$^1\text{H}$  NMR (400 MHz,  $\text{DMSO-}d_6$ )

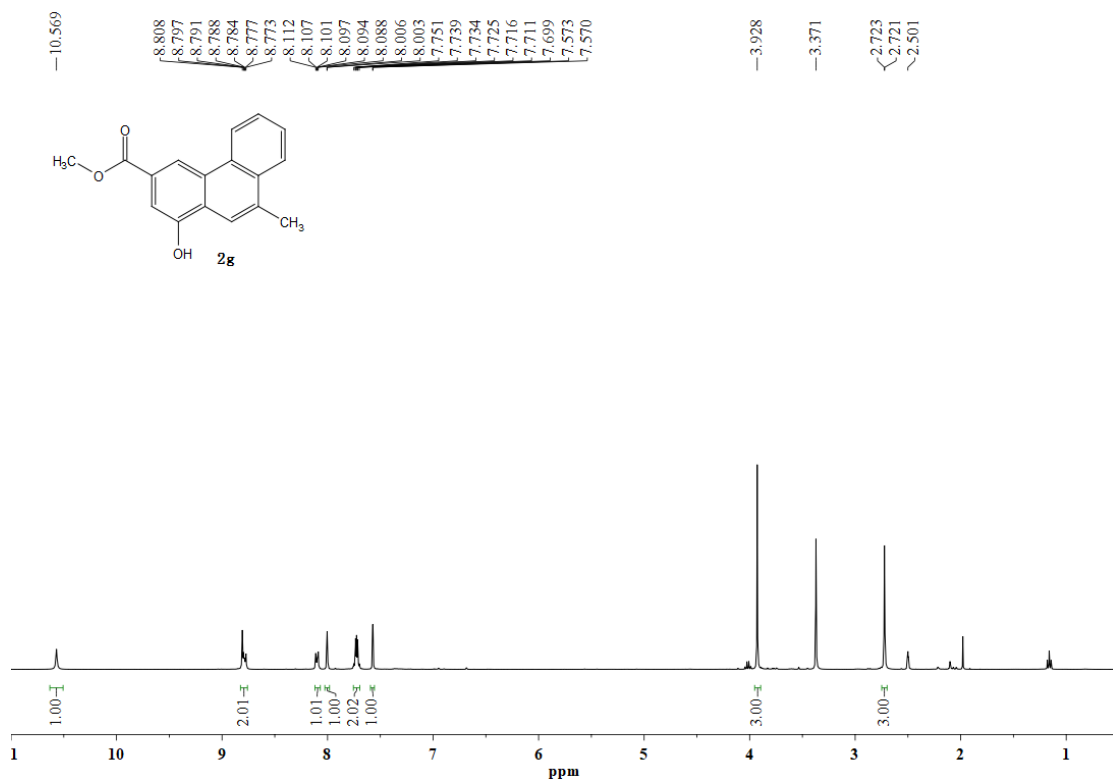

<sup>13</sup>C NMR (101 MHz, DMSO-*d*<sub>6</sub>)

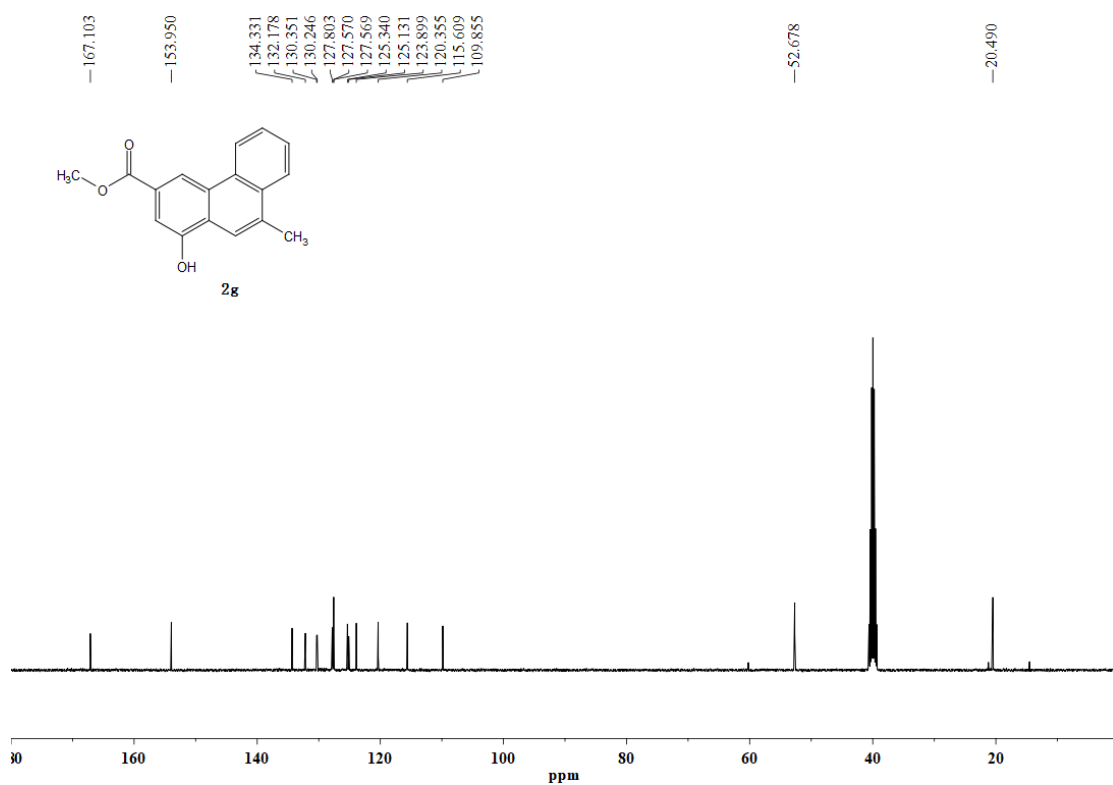

<sup>1</sup>H NMR (400 MHz, Chloroform-*d*)

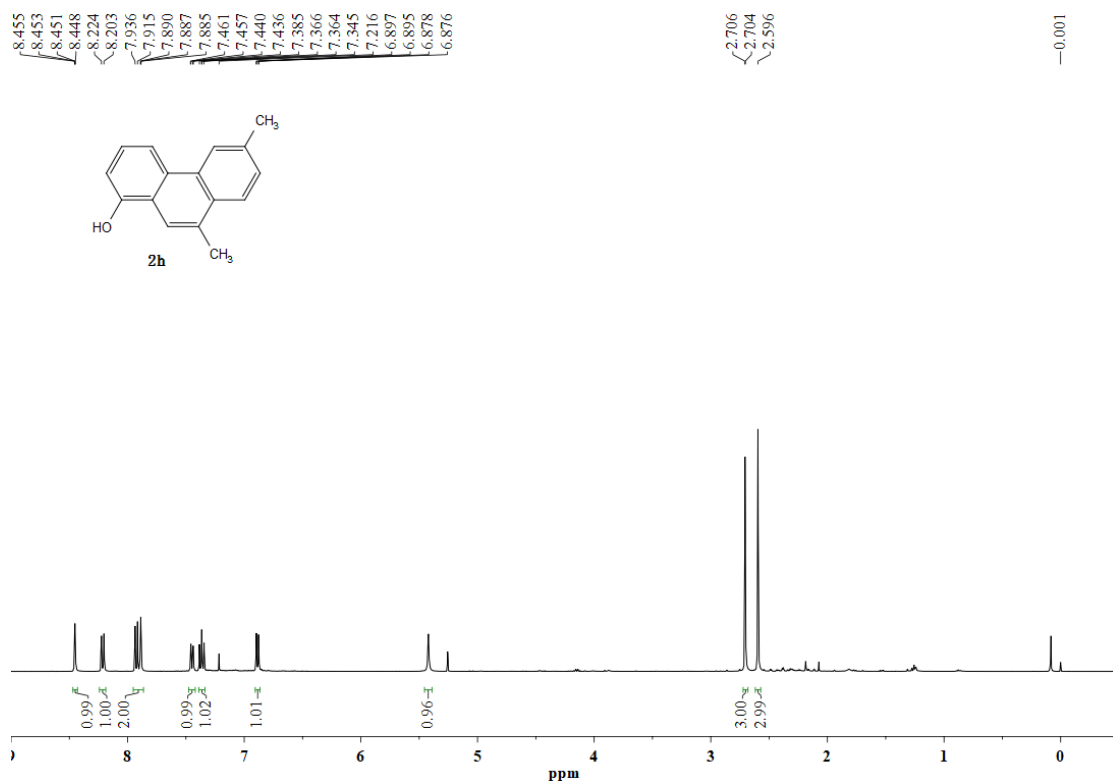

<sup>13</sup>C NMR (101 MHz, Chloroform-*d*)

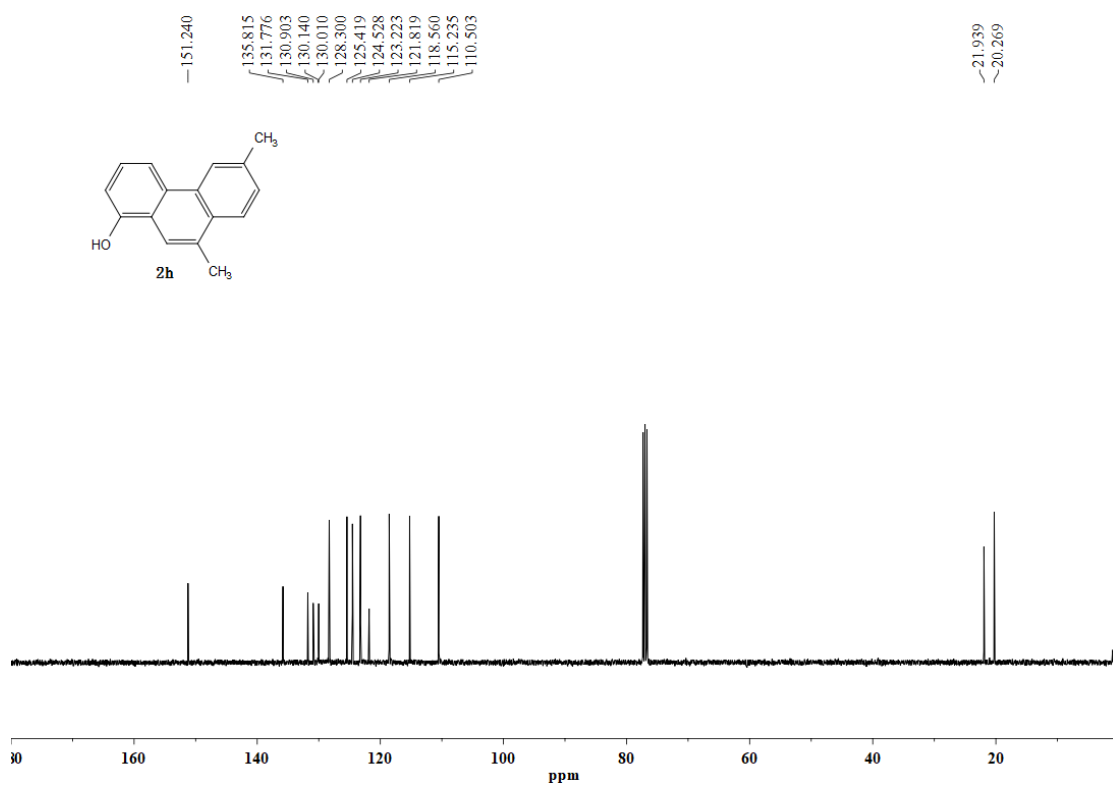

<sup>1</sup>H NMR (400 MHz, Methanol-*d*<sub>4</sub>)

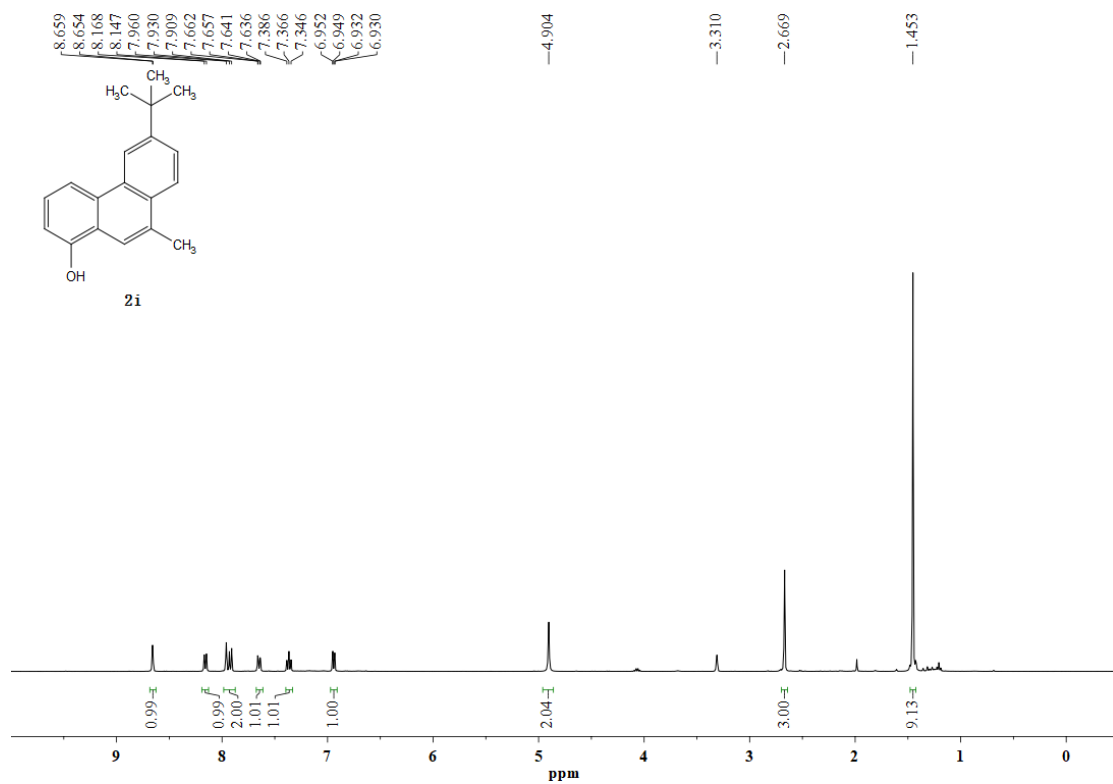



<sup>13</sup>C NMR (101 MHz, Methanol-*d*<sub>4</sub>)

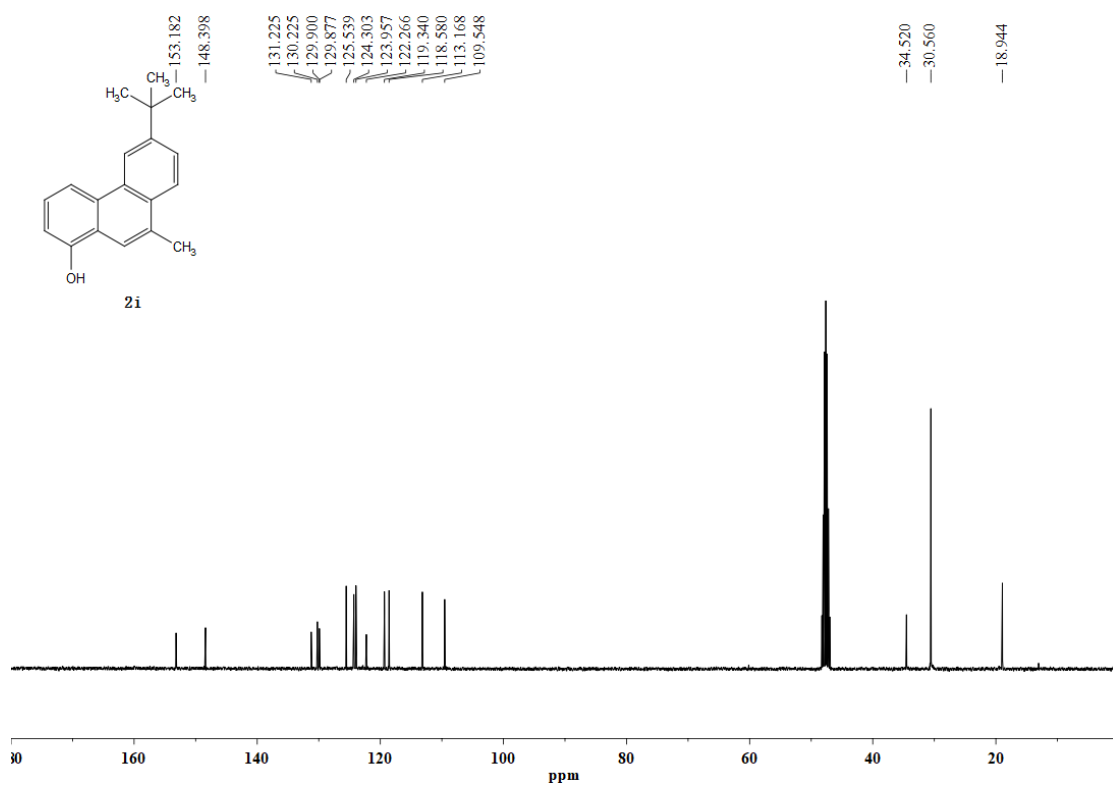

<sup>1</sup>H NMR (400 MHz, Methanol-*d*<sub>4</sub>)

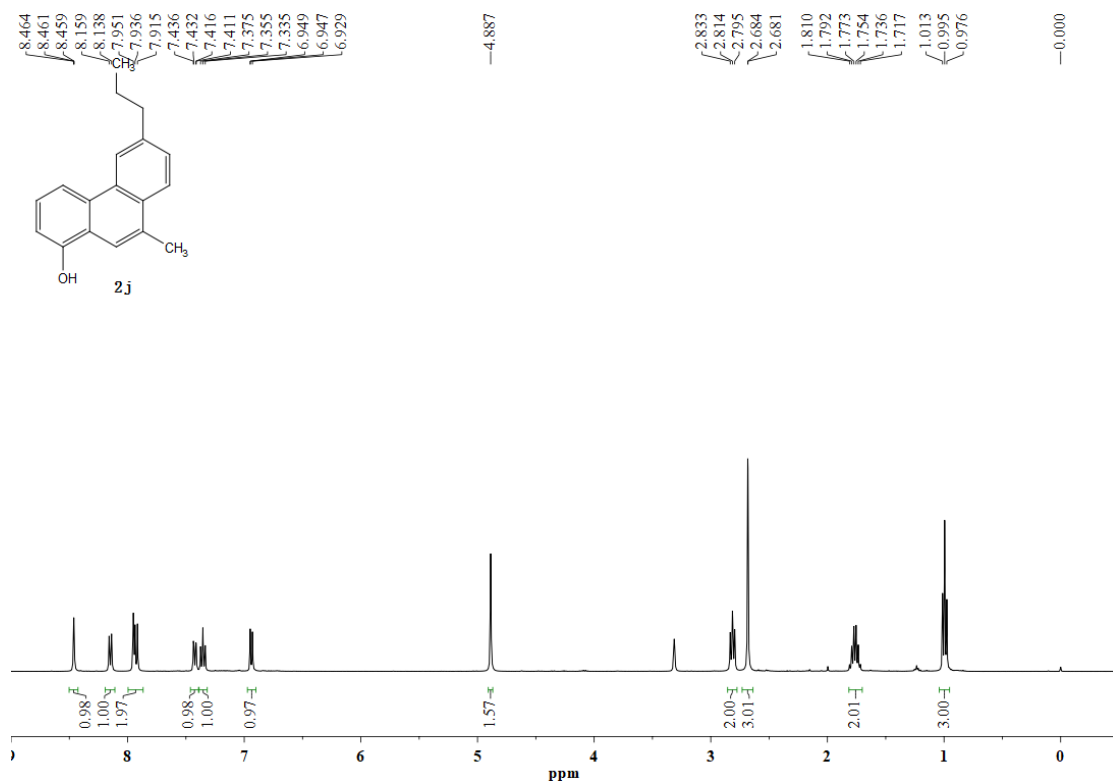

<sup>13</sup>C NMR (101 MHz, Methanol-d<sub>4</sub>)

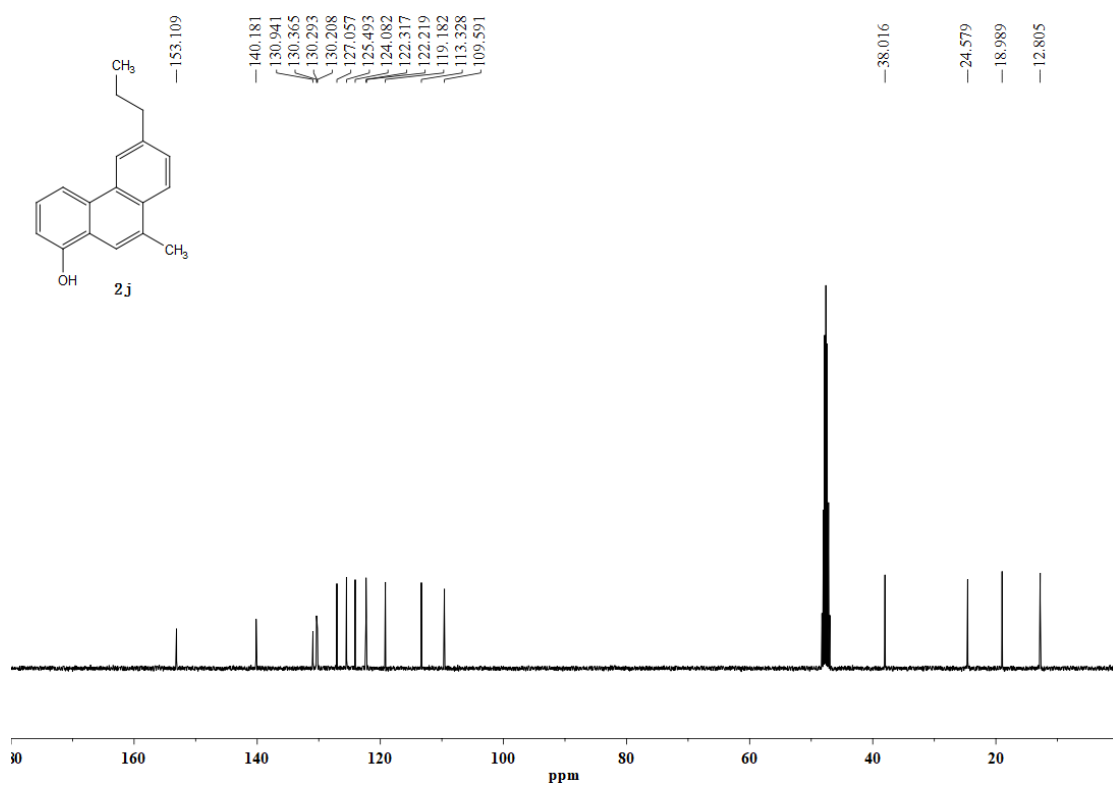

<sup>1</sup>H NMR (400 MHz, Methanol-d<sub>4</sub>)

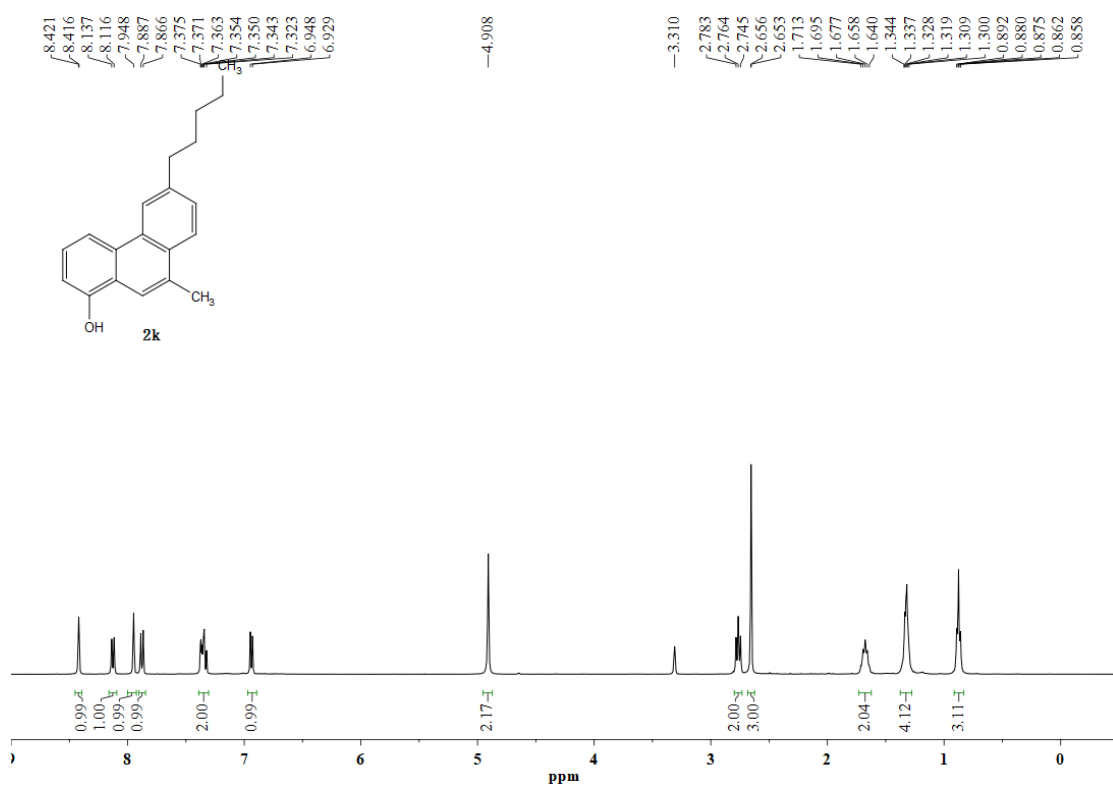

<sup>13</sup>C NMR (101 MHz, Methanol-*d*<sub>4</sub>)

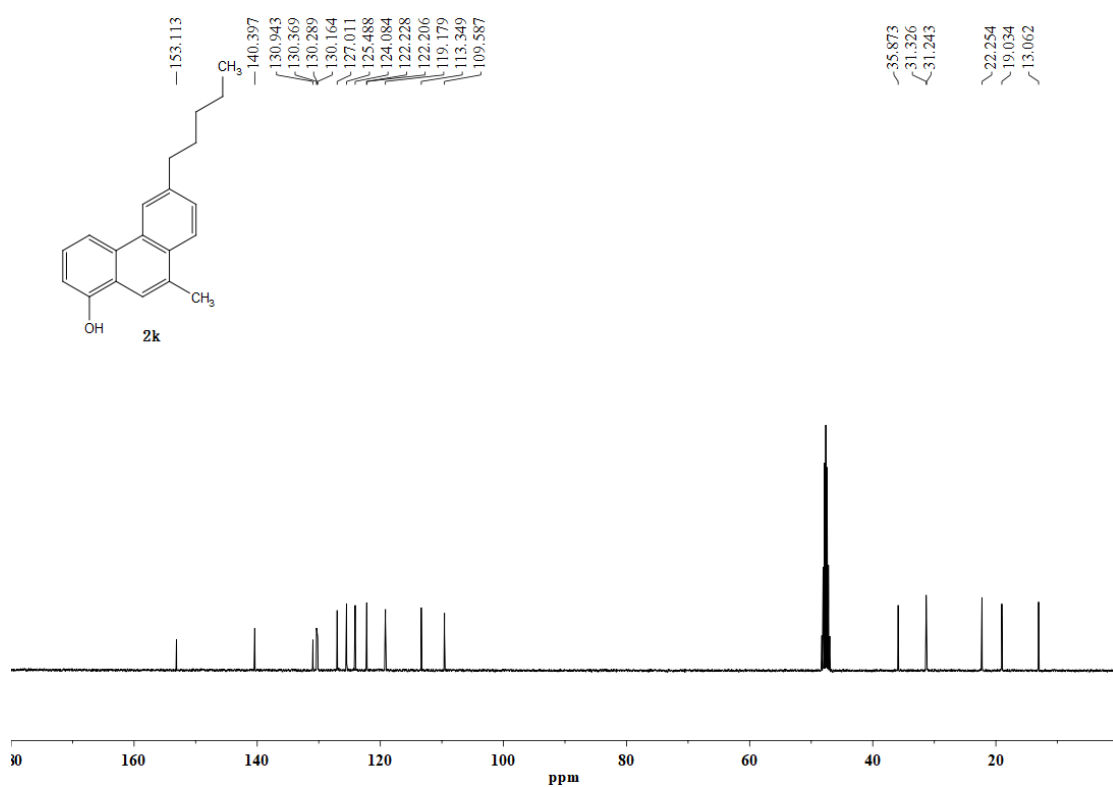

<sup>1</sup>H NMR (400 MHz, Methanol-*d*<sub>4</sub>)

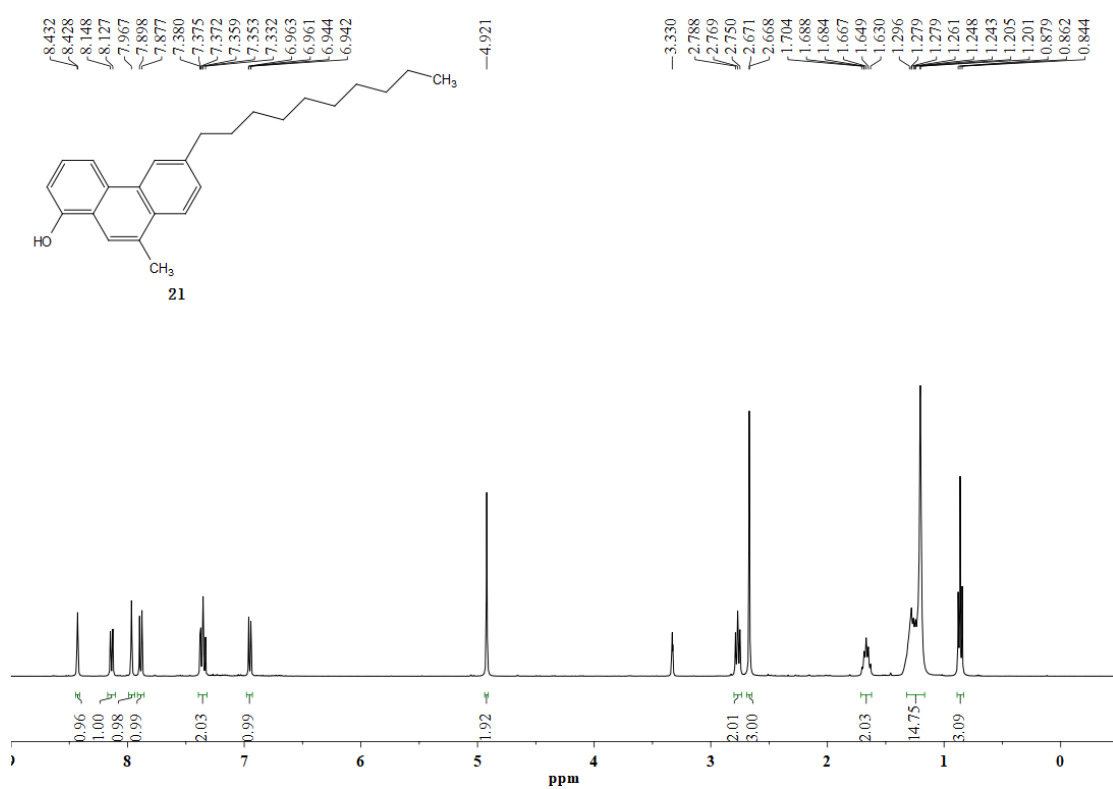

<sup>13</sup>C NMR (101 MHz, Methanol-*d*<sub>4</sub>)

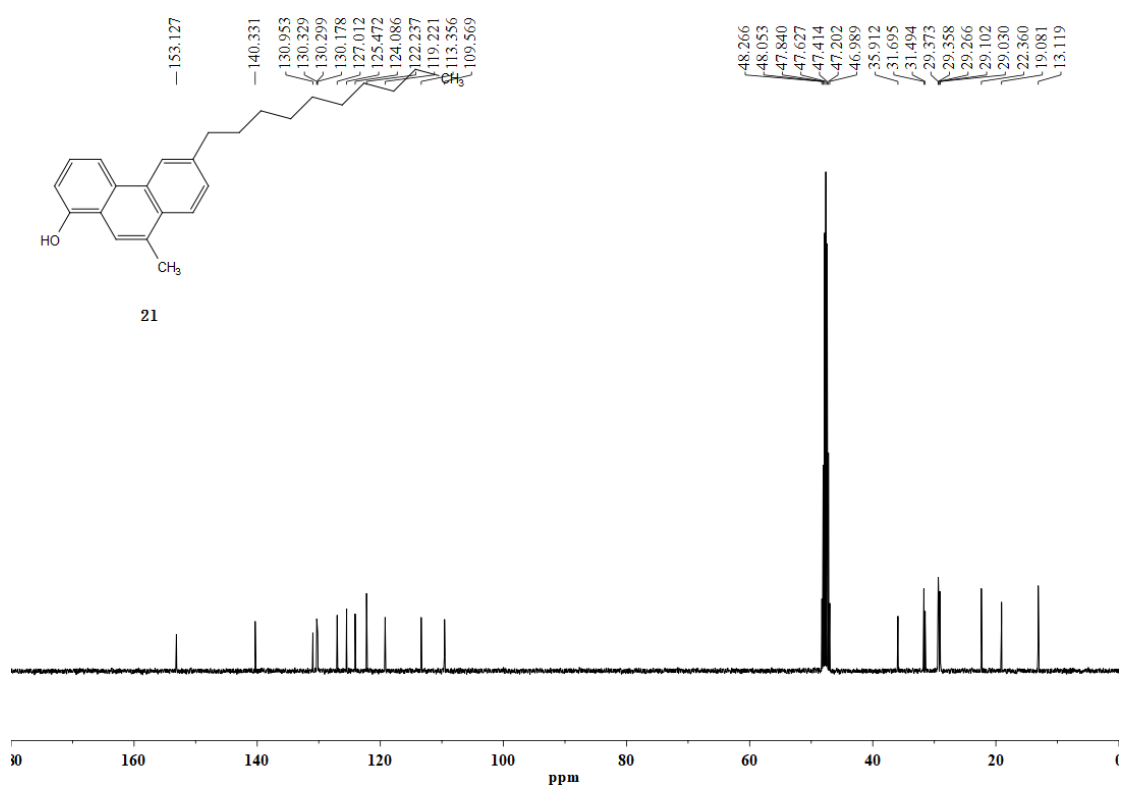

<sup>1</sup>H NMR (400 MHz, DMSO-*d*<sub>6</sub>)

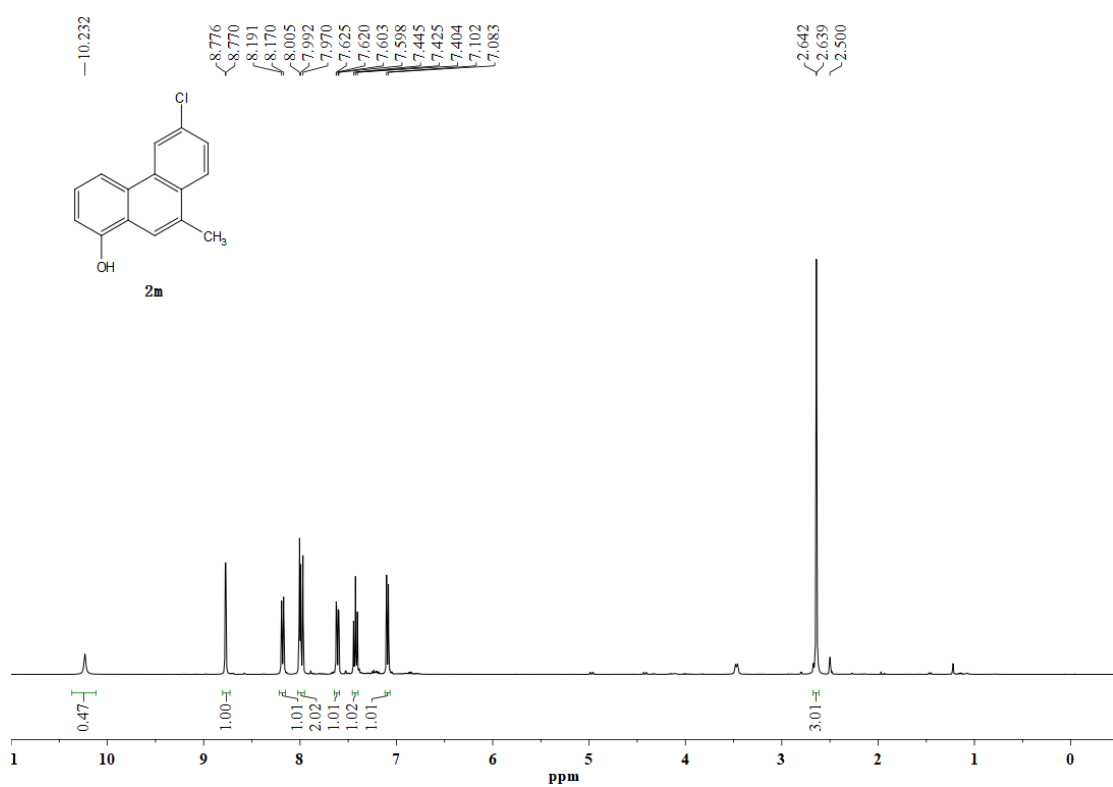

<sup>13</sup>C NMR (101 MHz, DMSO-*d*<sub>6</sub>)

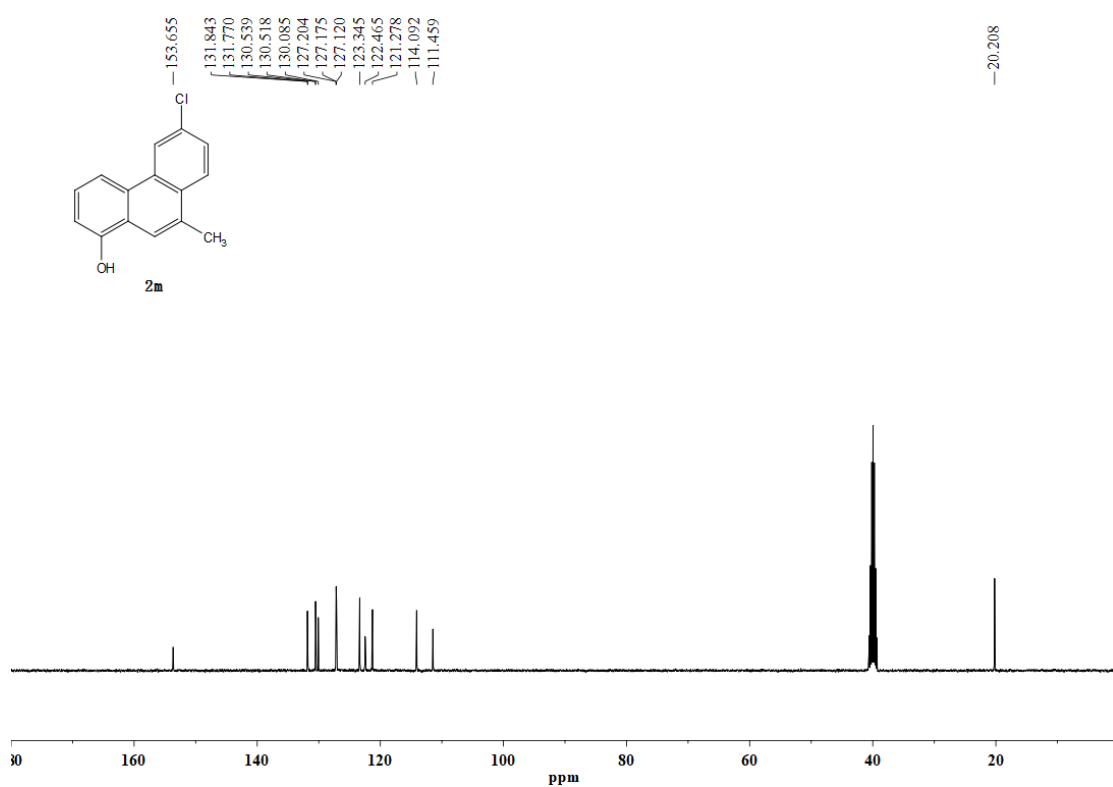

<sup>1</sup>H NMR (400 MHz, Methanol-*d*<sub>4</sub>)

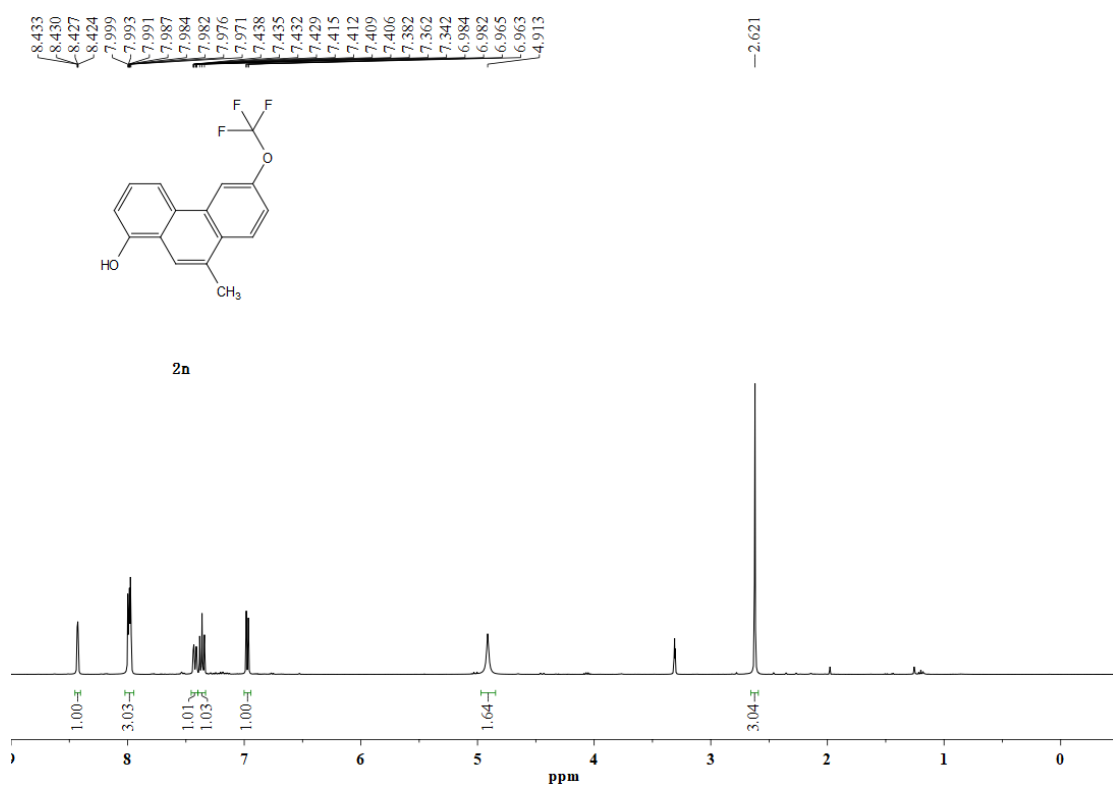

<sup>13</sup>C NMR (101 MHz, Methanol-*d*<sub>4</sub>)

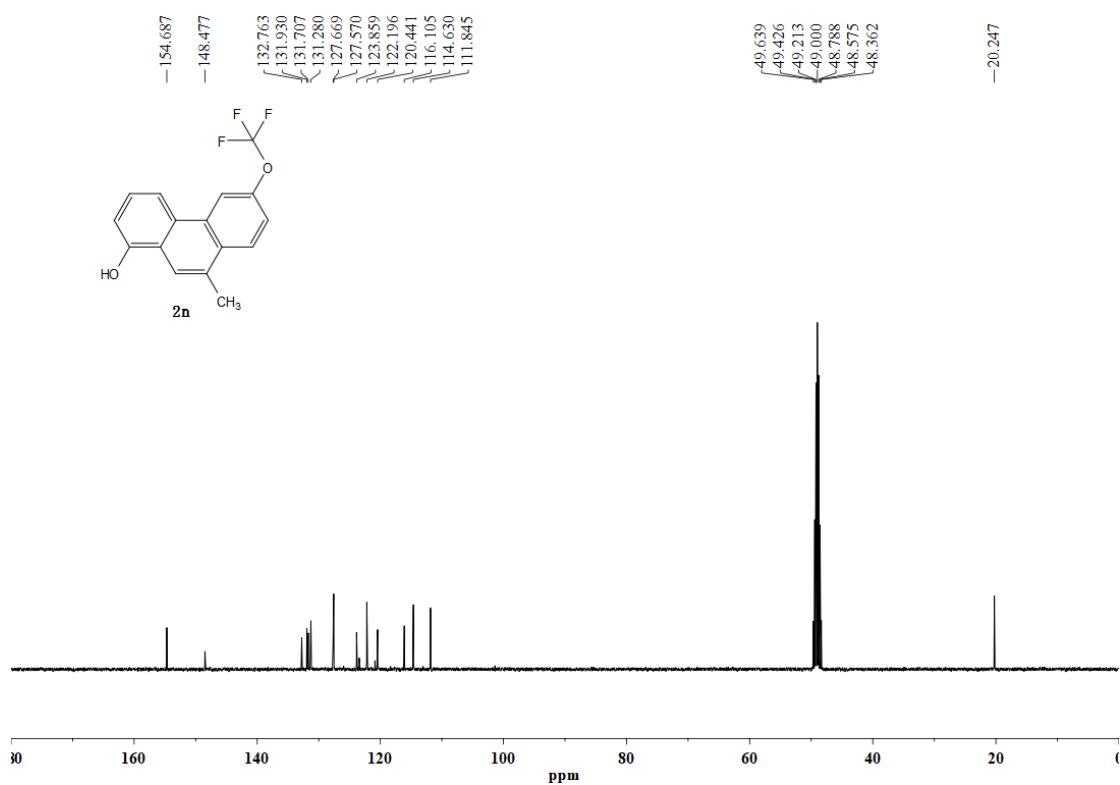

<sup>19</sup>F NMR (376 MHz, Methanol-*d*<sub>4</sub>)

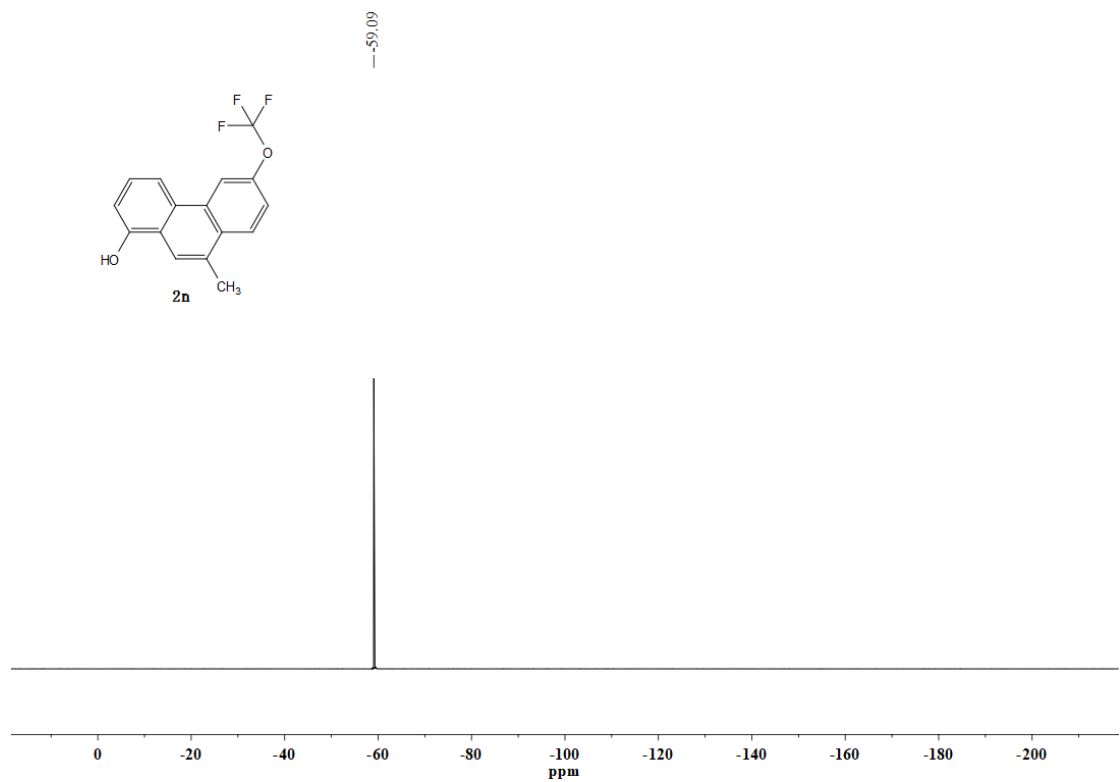

$^1\text{H}$  NMR (400 MHz,  $\text{DMSO-}d_6$ )

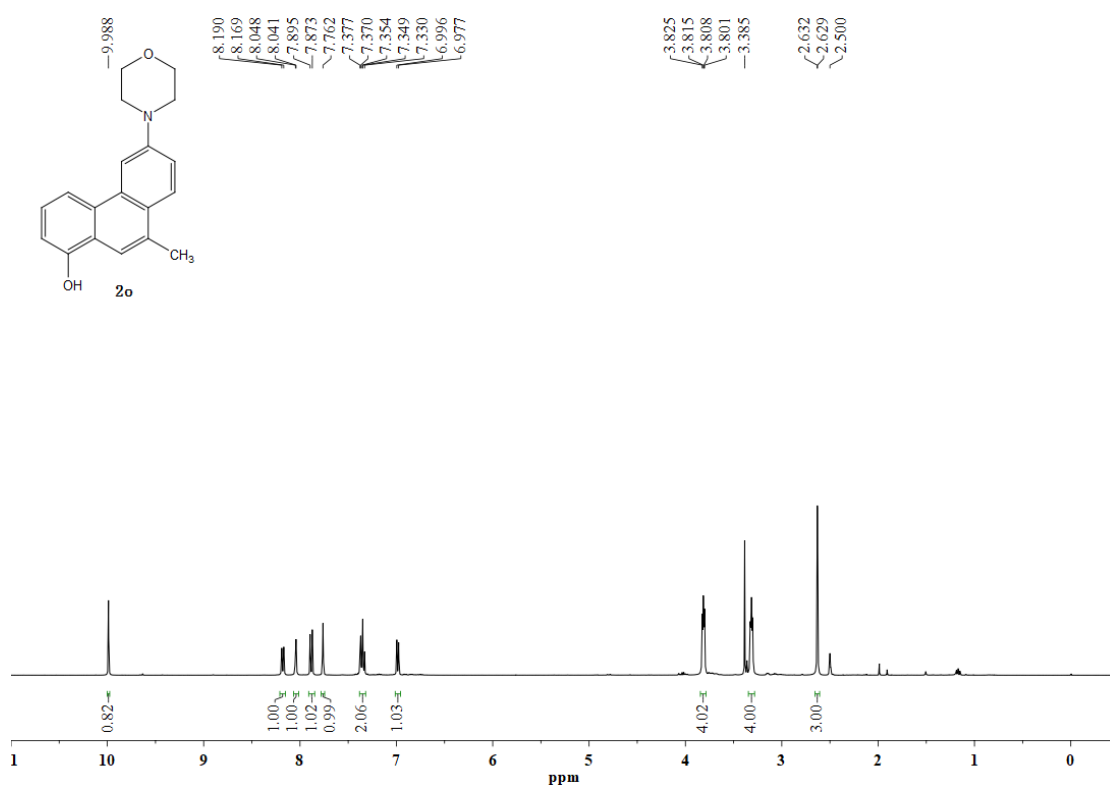

$^{13}\text{C}$  NMR (101 MHz,  $\text{DMSO-}d_6$ )

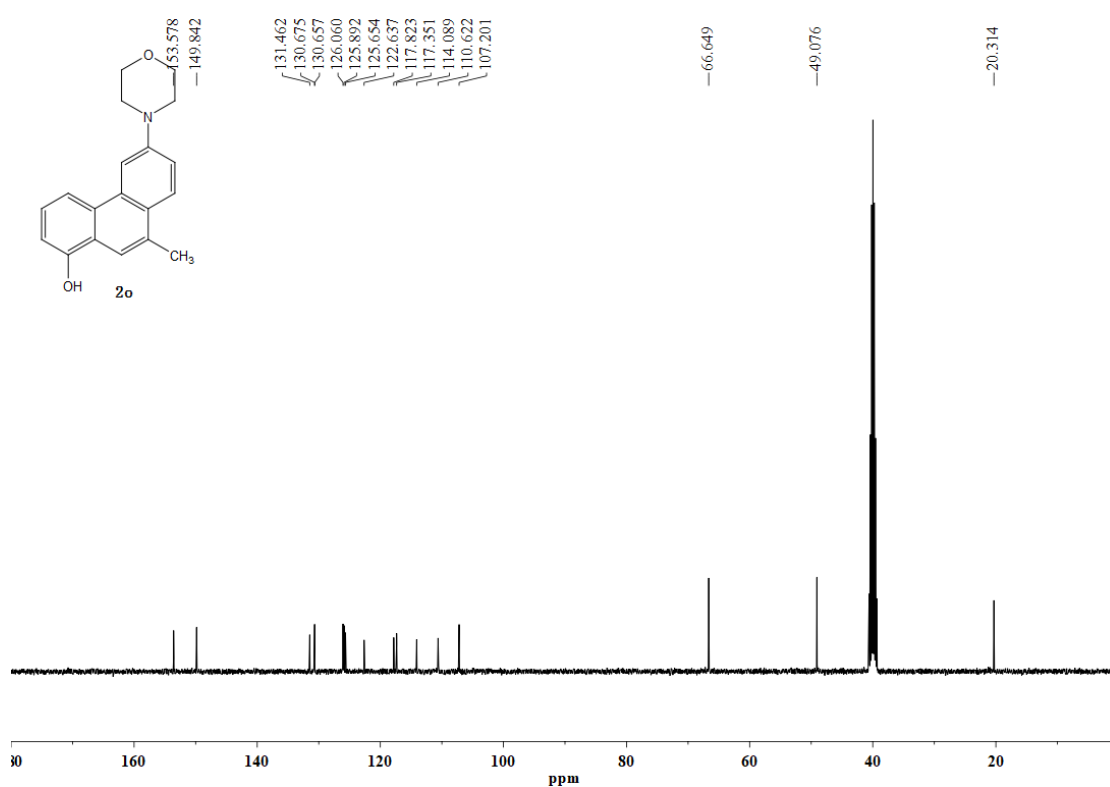

<sup>1</sup>H NMR (400 MHz, DMSO-*d*<sub>6</sub>)

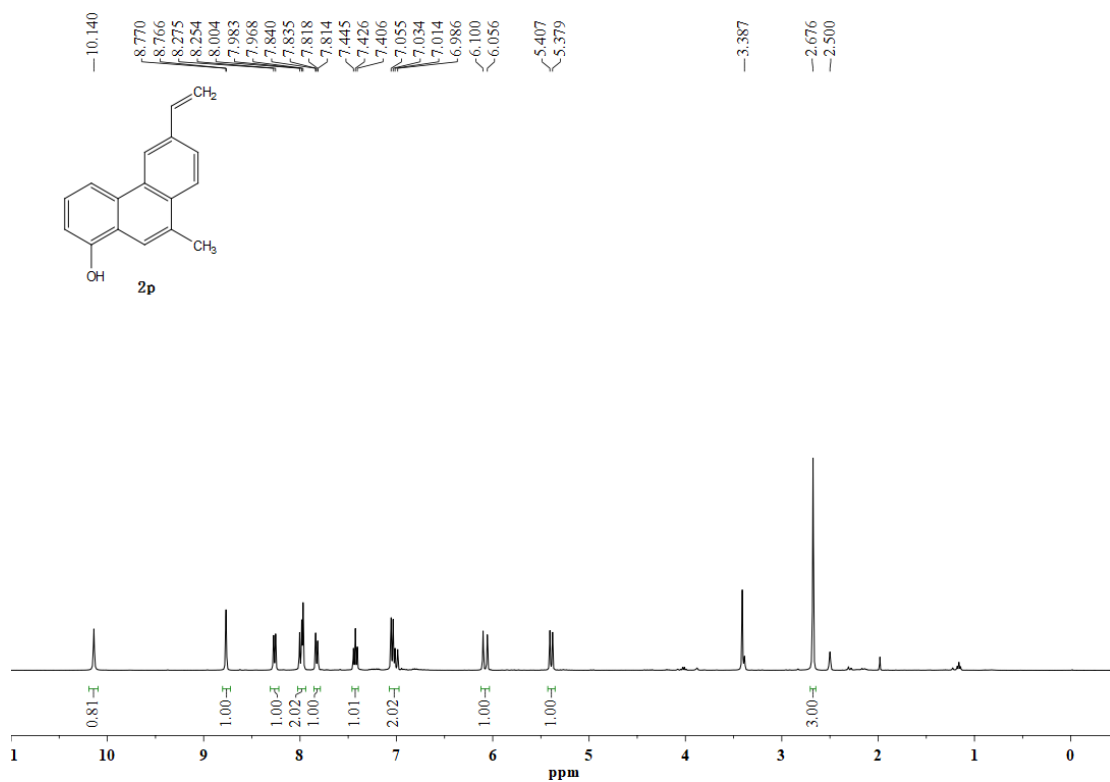

<sup>13</sup>C NMR (101 MHz, DMSO-*d*<sub>6</sub>)

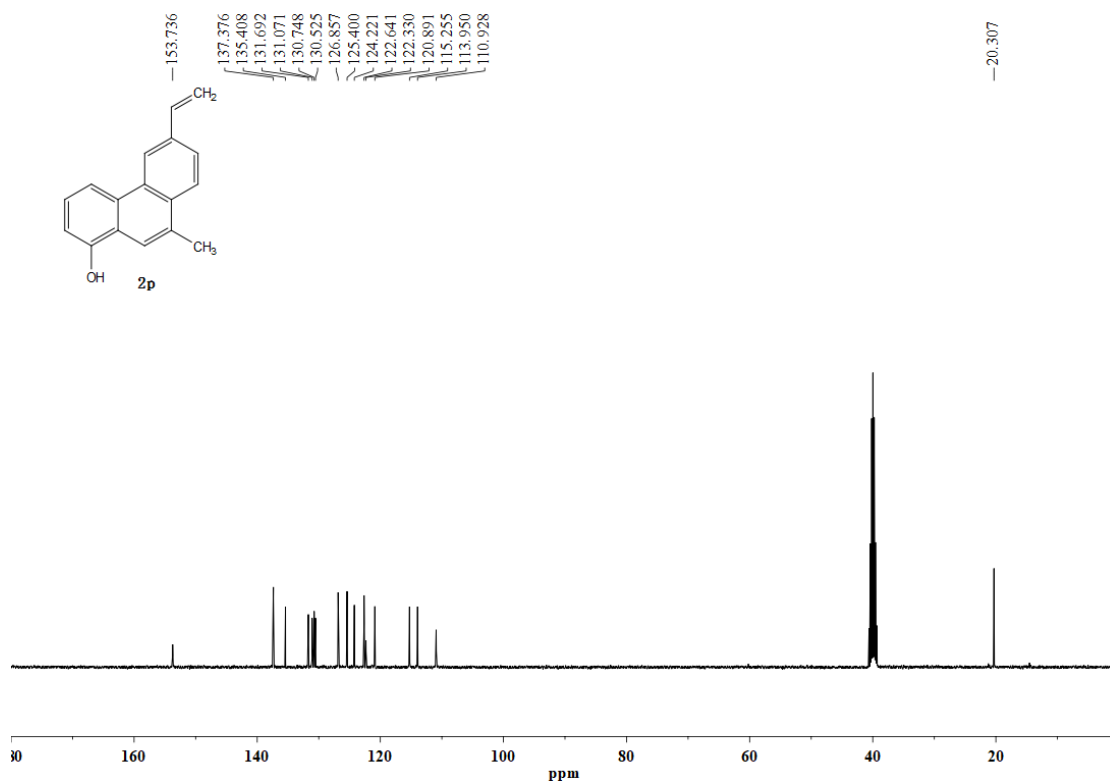



<sup>1</sup>H NMR (400 MHz, Methanol-d<sub>4</sub>)

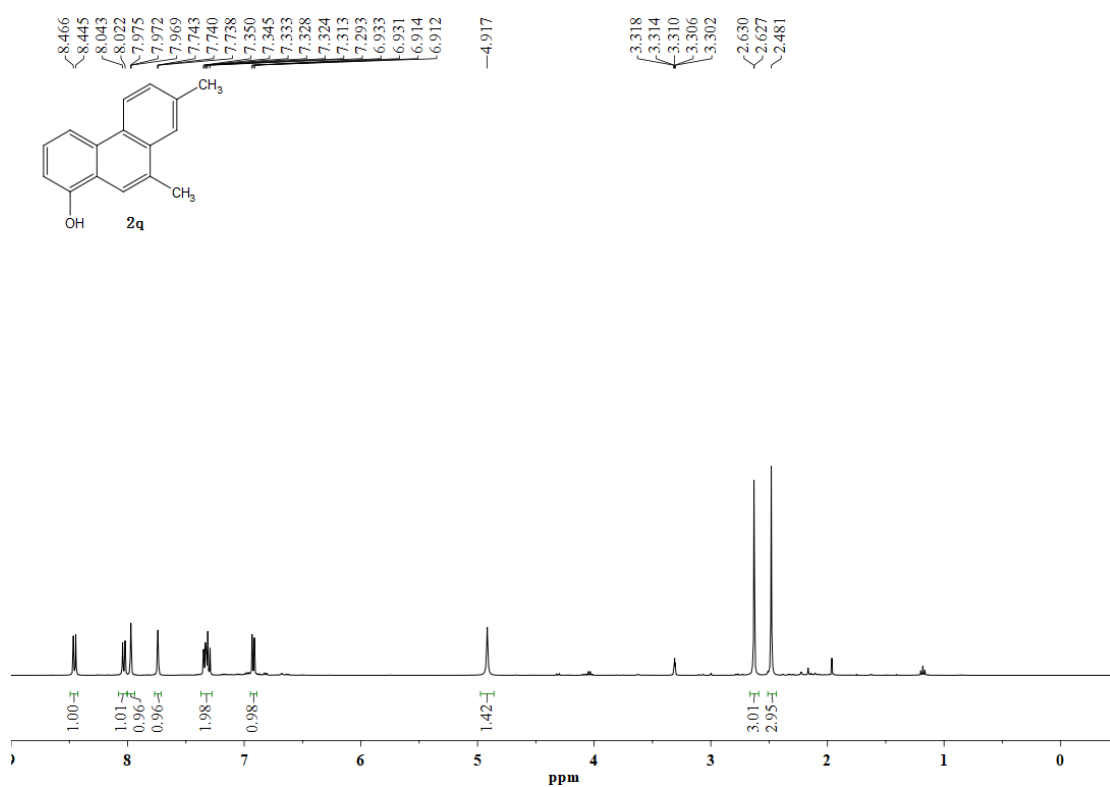

<sup>13</sup>C NMR (101 MHz, Methanol-d<sub>4</sub>)

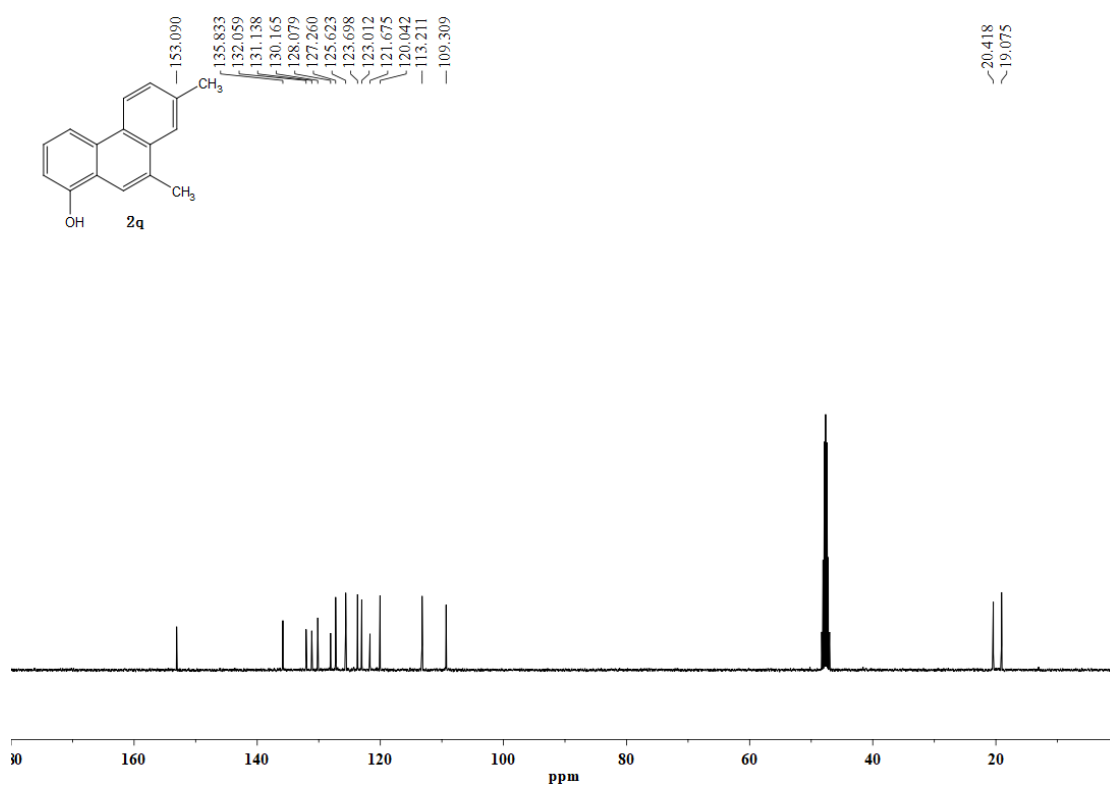

<sup>1</sup>H NMR (400 MHz, DMSO-*d*<sub>6</sub>)

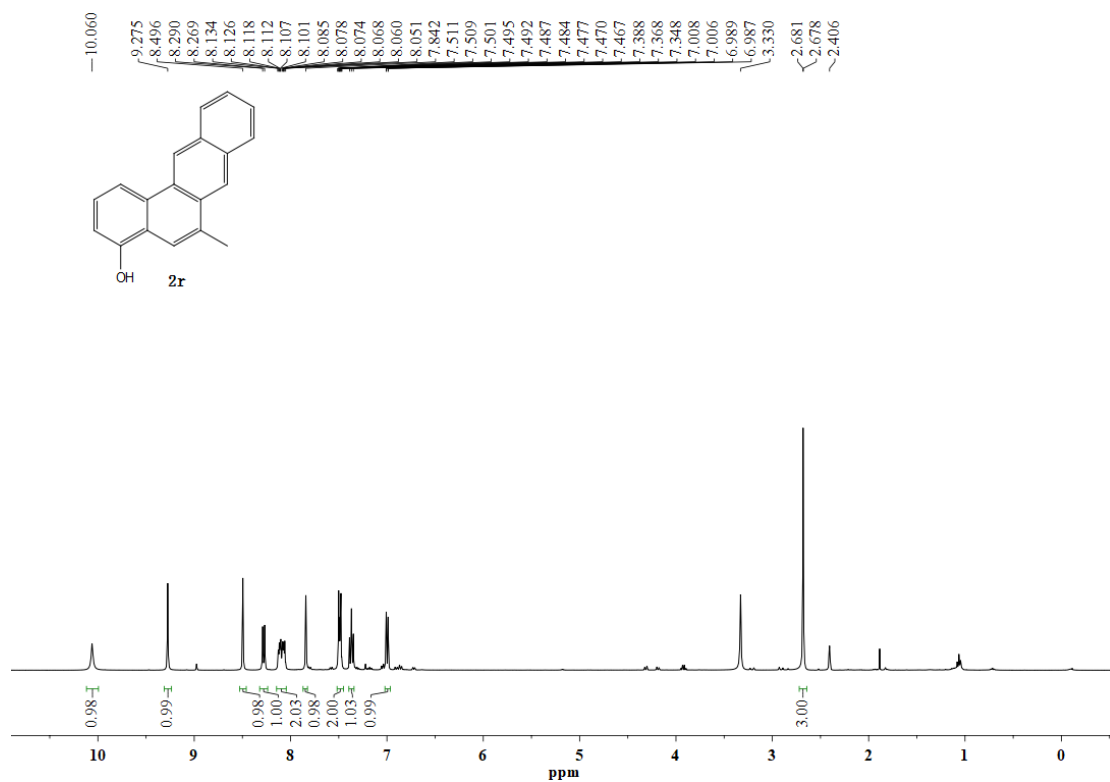

<sup>13</sup>C NMR (101 MHz, DMSO-*d*<sub>6</sub>)

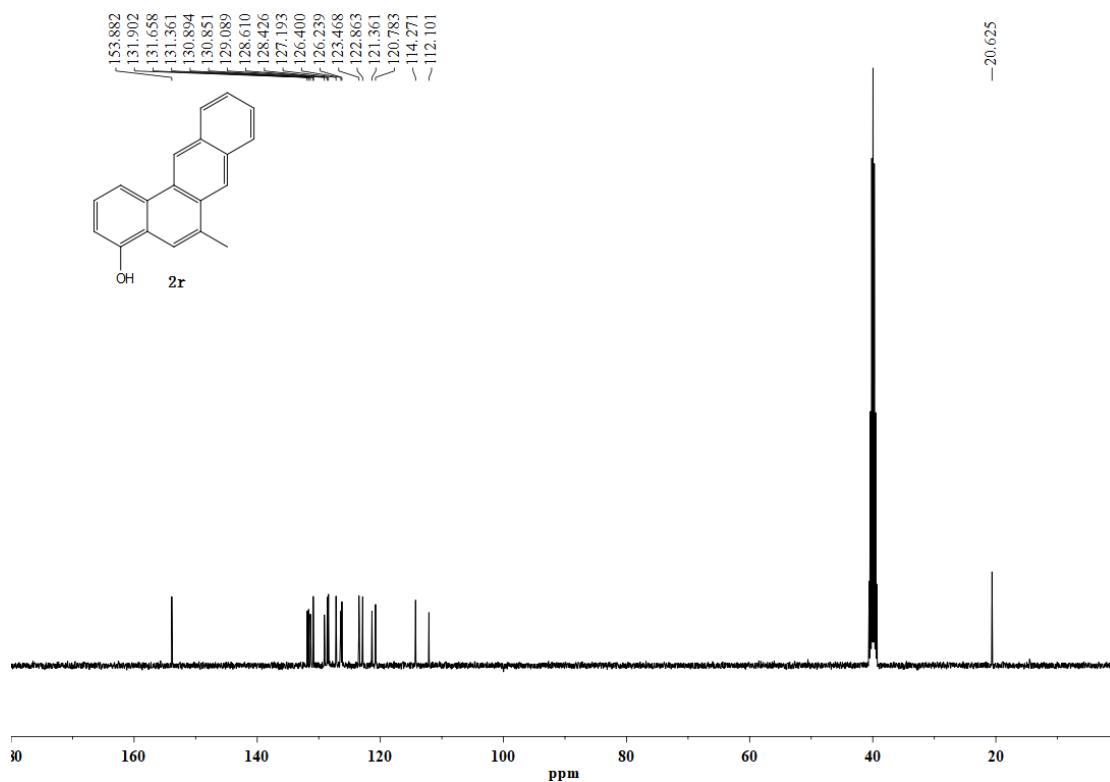

## 5 X-ray Crystallographic Data of 2q

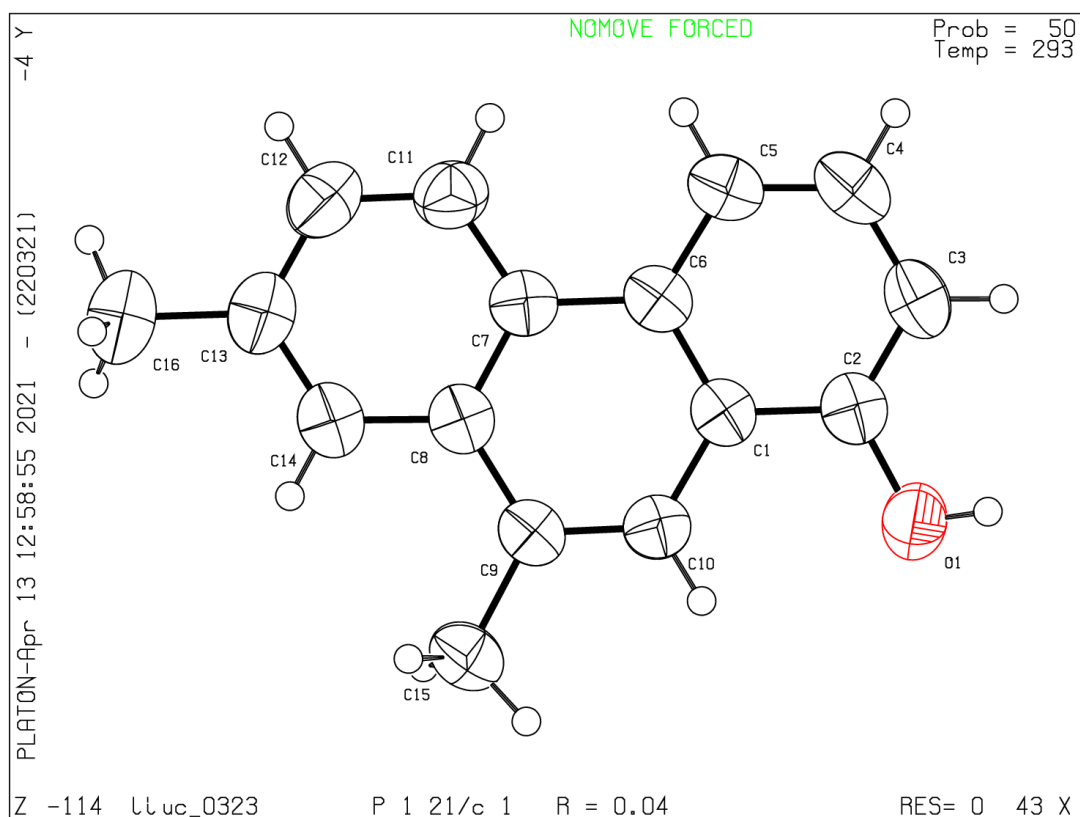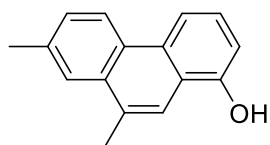

**2q** CCDC: 2011205

Thermal ellipsoids are drawn at 50% probability level.

**Sample preparation:** A solution of compound **2q** (50 mg) in ethyl acetate was placed in a vial (5 mL). Petroleum ether was added to the vial with a dropper until a small amount of solid precipitation, then, added the ethyl acetate until the solution clarification. The single crystal **2q** was obtained by slowly evaporating mixed solvent at room temperature under the air conditions.

**Crystal measurement:** X-ray crystal structures were determined at 295 K. The crystal was measured on a SuperNova, Dual, Cu at zero, Eos diffractometer.

---

|                                                               |                                                     |                    |
|---------------------------------------------------------------|-----------------------------------------------------|--------------------|
| Bond precision:                                               | C-C = 0.0019 Å                                      | Wavelength=1.54184 |
| Cell:                                                         | a=16.9314(10)      b=5.2194(3)      c=13.7603(8)    |                    |
|                                                               | alpha=90              beta=105.149(6)      gamma=90 |                    |
| Temperature:                                                  | 293 K                                               |                    |
|                                                               | Calculated                                          | Reported           |
| Volume                                                        | 1173.76(12)                                         | 1173.76(12)        |
| Space group                                                   | P 21/c                                              | P 1 21/c 1         |
| Hall group                                                    | -P 2ybc                                             | -P 2ybc            |
| Moiety formula                                                | C16 H14 O                                           | C16 H14 O          |
| Sum formula                                                   | C16 H14 O                                           | C16 H14 O          |
| Mr                                                            | 222.27                                              | 222.27             |
| Dx, g cm <sup>-3</sup>                                        | 1.258                                               | 1.258              |
| Z                                                             | 4                                                   | 4                  |
| Mu (mm <sup>-1</sup> )                                        | 0.597                                               | 0.597              |
| F000                                                          | 472.0                                               | 472.0              |
| F000'                                                         | 473.30                                              |                    |
| h,k,lmax                                                      | 20,6,16                                             | 20,6,16            |
| Nref                                                          | 2088                                                | 2086               |
| Tmin,Tmax                                                     | 0.898,0.931                                         | 0.750,1.000        |
| Tmin'                                                         | 0.898                                               |                    |
| Correction method= # Reported T Limits: Tmin=0.750 Tmax=1.000 |                                                     |                    |
| AbsCorr = MULTI-SCAN                                          |                                                     |                    |
| Data completeness= 0.999                                      | Theta(max)= 66.599                                  |                    |
| R(reflections)= 0.0398( 1703)                                 | wR2(reflections)= 0.1244( 2086)                     |                    |
| S = 1.046                                                     | Npar= 158                                           |                    |

---

## 6 Reference

- (1) Ye, J.; Shi, Z.; Sperger, T.; Yasukawa, Y.; Kingston, C.; Schoenebeck, F.; Lautens, M., *Nature Chemistry* **2017**, *9*, 361.
- (2) Yoon, H.; Lossouarn, A.; Landau, F.; Lautens, M., *Org. Lett.* **2016**, *18*, 6324.
- (3) Liu, C.; Li, Y.; Shi, W.-Y.; Ding, Y.-N.; Zheng, N.; Liu, H.-C.; Liang, Y.-M., *Org. Lett.* **2021**.
- (4) Lu, L.; Siu, J. C.; Lai, Y.; Lin, S., *J. Am. Chem. Soc.* **2020**, *142*, 21272.
- (5) Liang, R.-X.; Chen, R.-Y.; Zhong, C.; Zhu, J.-W.; Cao, Z.-Y.; Jia, Y.-X., *Org. Lett.* **2020**, *22*, 3215.
- (6) Huang, Q.; Fazio, A.; Dai, G.; Campo, M. A.; Larock, R. C., *J. Am. Chem. Soc.* **2004**, *126*, 7460.
- (7) Bovonsombat, P.; Leykajarakul, J.; Khan, C.; Pla-on, K.; Krause, M. M.; Khanthapura, P.; Ali, R.; Doowa, N., *Tetrahedron Lett.* **2009**, *50*, 2664.
- (8) (a) Qi, Z.; Wang, H.; Ren, Y.; Niu, Y.; Jiang, Y.; Yan, R., *Chem. Commun.* **2020**, *56*, 15627. (b) Duan, Z.-C.; Hu, X.-P.; Zhang, C.; Wang, D.-Y.; Yu, S.-B.; Zheng, Z., *J. Org. Chem.* **2009**, *74*, 9191.
